# Supplementary material for: The triple oxygen isotope composition of phytoliths as a proxy of continental atmospheric humidity: insights from climate chamber and climate transect calibrations
Source: Copernicus journal article supplement (doi:10.5194/bg-2017-471), 2017-11-08
Supplement: Supplementary file [file bg-2017-471-AC2-supplement.pdf]

**We would like to thank reviewer #2 for his/her constructive comments. The points of concern are addressed below. In the revised draft, changes are highlighted in grey.**

*The authors present the results of triple oxygen isotope measurements of plant silica. The aim of this study is introducing  $\delta^{17}\text{O}$  and  $\delta^{18}\text{O}$  of phytoliths as proxy for the relative humidity (RH). The authors conducted laboratory experiments with controlled irrigation water composition, temperature and relative humidity. Data show that the difference in  $\delta^{17}\text{O}$  between irrigation water and phytolith changes with RH. That is expected as the kinetic fractionation becomes more important at lower RH. Because kinetic fractionation follows a slope 0.516 (and 0.528 was used as reference line for defining  $\delta^{17}\text{O}$ ), resultant  $\delta^{17}\text{O}$  values of the phytolith change with RH.*

*The authors point out that the weakness of this study is the lack of vapor data. That is true and the study would certainly have benefited from such data. The results show that the phytoliths fall on a line about parallel to the water evaporation trend typical of leaf water.*

- In figure, the lines should go through all data, including the RH = 100 points. If necessary, draw curves. There is no physical reason why the laws of nature stop operating at RH = 85. It is a continuum; possibly with gradually changing mechanisms above RH = 85. That should not be camouflaged in the figure.*

In agreement with this comment, modifications were made to figure 1 as well as in the text (section 3.1) of the revised draft.

- For readers with a b&w printer only, different symbols would be appropriate to distinguish the different data.*

This was modified in the revised draft.

- In figure 1, " $\delta^{17}\text{O}$ -excess" (top, bottom) is not relative to VSMOW. It is, however, reported relative to a reference line with slope (0.528) and intercept (0). Delete "VSMOW". Also, the  $\Delta^{18}\text{O}$  should not be reported relative to VSMOW; it's a difference between  $\delta$  values; delete VSMOW here, too.*

This is right. This was modified in the revised draft.

- Line 386ff: Don't give numbers like  $27.948 \pm 7.168$  ! Give  $28 \pm 7$ . Only report significant number of digits. See also line 405; never give more digits than the uncertainty allows. Change throughout the entire manuscript.*

The precision on  $\delta^{17}\text{O}$  and  $\delta^{18}\text{O}$  should indeed be given with only 2 digits. Still, as shown in Landais et al. (2006) for leaf water, the uncertainties on  $\delta^{17}\text{O}$  and  $\delta^{18}\text{O}$  are not independent so that the final uncertainty on  $\delta^{17}\text{O}$ -excess should not be calculated from uncorrelated uncertainties on  $\delta^{17}\text{O}$  and  $\delta^{18}\text{O}$ . This is the reason why, there is a need to keep the 3 digits to properly calculate the  $\delta^{17}\text{O}$ -excess. For further clarity 2 digits are presented in the text and 3 digits are kept in tables.

- My major criticism on this paper is that it is not evaluated how precise (+/- RH values) the approach is for the reconstruction of the RH.*

In agreement with this comment, this is now discussed in the revised draft (section 4.2):

“Without taking into account the two outliers, the linear regression between  $\text{RH-rd0}>1$  and  $\delta^{17}\text{O-excess}_{\text{phyto}}$  for a 95% confidence interval can be expressed as follows:

$$\text{RH-rd0}>1 = 0.14 \pm 0.02 \text{ (S.E.)} \times \delta^{17}\text{O-excess}_{\text{phyto}} + 100.5 \pm 4.7 \text{ (S.E.)} \quad \text{Eq. 2}$$

where  $\delta^{17}\text{O-excess}_{\text{phyto}}$  is expressed in per meg and RH in %,  $r^2 = 0.48$ ,  $p < 0.001$  and S.E. stands for standard error. The S.E. of the predicted  $\text{RH-rd0}>1$  value is  $\pm 5.6\%$ . However, the data scattering (fig. 4) call

for assessing additional parameters that can contribute to changes in  $^{17}\text{O}$ -excess<sub>Phyto</sub>, beside RH, before using the  $^{17}\text{O}$ -excess<sub>phyto</sub> for quantitative RH reconstruction.”

- *Also, completely missing is a discussion on the heterogeneity of leaf water and the effect on the phytolith composition. Eventually, people will use fossil phytoliths for reconstructing past RH and they will not know from which part of the plant the samples come.*

This is now discussed in section 4.2: “In grasses, leaf water is expected to be more prone to evaporative enrichment than stem water, and inside the leaf itself, the heterogeneity of evaporative sites repartition and water movements can lead to a significant heterogeneity in the  $\delta^{18}\text{O}$  signatures of water and phytoliths (Cernusak et al., 2016; Helliker and Ehleringer, 2000; Webb and Longstaffe, 2002). Soil top phytolith assemblages likely record several decades of annual phytolith production and their isotope composition is expected to be an average. This would explain the consistency of the  $^{17}\text{O}$ -excess<sub>Phyto</sub> data obtained from bulk grass from climate chambers and bulk grasses from natural savannas. However, further investigation on the extent of the heterogeneity of  $^{17}\text{O}$ -excess signature of water and phytoliths in mature grasses would help to clarify the links between water and phytolith signatures and better understand the phytolith proxy.”

- *After this assessment, come to a decision on whether this proxy works or not (for useful applications). The lack of a quantitative assessment of all uncertainties is a general problem of many proxies. With some corrections and such a quantitative discussion, the manuscript is surely worth being published in Biogeosciences.*

We agree with all the points of concern raised above (see answers above). However, as written in the discussion and conclusion sections we would like to emphasize that this is a first step in the assessment and that complementary calibration steps are required to bring us to an accurate quantitative proxy. These assessments, described in the discussion section, are in progress.

## References

- Cernusak, L.A., Barbour, M.M., Arndt, S.K., Cheesman, A.W., English, N.B., Feild, T.S., Helliker, B.R., Holloway-Phillips, M.M., Holtum, J.A.M., Kahmen, A., et al. (2016). Stable isotopes in leaf water of terrestrial plants. *Plant Cell Environ.* 39, 1087–1102.
- Crespin, J., Alexandre, A., Sylvestre, F., Sonzogni, C., Paillès, C., and Garreta, V. (2008). IR laser extraction technique applied to oxygen isotope analysis of small biogenic silica samples. *Anal. Chem.* 80, 2372–2378.
- Franchi, I.A., Wright, I.P., Sexton, A.S., and Pillinger, C.T. (1999). The oxygen-isotopic composition of Earth and Mars. *Meteorit. Planet. Sci.* 34, 657–661.
- Helliker, B.R., and Ehleringer, J.R. (2000). Establishing a grassland signature in veins:  $^{18}\text{O}$  in the leaf water of C3 and C4 grasses. *Proc. Natl. Acad. Sci. U. S. A.* 97, 7894–7898.
- Pack, A., Tanaka, R., Hering, M., Sengupta, S., Peters, S., and Nakamura, E. (2016). The oxygen isotope composition of San Carlos olivine on the VSMOW2-SLAP2 scale. *Rapid Commun. Mass Spectrom.* 30, 1495–1504.
- Schmidt, M., Maseyk, K., Lett, C., Biron, P., Richard, P., Bariac, T., and Seibt, U. (2012). Reducing and correcting for contamination of ecosystem water stable isotopes measured by isotope ratio infrared spectroscopy. *Rapid Commun. Mass Spectrom.* 26, 141–153.
- Sharp, Z.D., Gibbons, J.A., Maltsev, O., Atudorei, V., Pack, A., Sengupta, S., Shock, E.L., and Knauth, L.P. (2016). A calibration of the triple oxygen isotope fractionation in the  $\text{SiO}_2\text{--H}_2\text{O}$  system and applications to natural samples. *Geochim. Cosmochim. Acta* 186, 105–119.
- Suavet, C., Alexandre, A., Franchi, I.A., Gattacceca, J., Sonzogni, C., Greenwood, R.C., Folco, L., and Rochette, P. (2010). Identification of the parent bodies of micrometeorites with high-precision oxygen isotope ratios. *Earth Planet. Sci. Lett.* 293, 313–320.
- Tanaka, R., and Nakamura, E. (2013). Determination of  $^{17}\text{O}$ -excess of terrestrial silicate/oxide minerals

89 with respect to Vienna Standard Mean Ocean Water (VSMOW). Rapid Commun. Mass Spectrom.  
90 RCM 27, 285–297.  
91

**The triple oxygen isotope composition of phytoliths as a proxy of continental atmospheric humidity: insights from climate chamber and climate transect calibrations**

Anne Alexandre<sup>1</sup>, Amaelle Landais<sup>3</sup>, Christine Vallet-Coulomb<sup>1</sup>, Clément Piel<sup>3</sup>, Sébastien Devidal<sup>3</sup>, Sandrine Pauchet<sup>1</sup>, Corinne Sonzogni<sup>1</sup>, Martine Couapel<sup>1</sup>, Marine Pasturel<sup>1</sup>, Pauline Cornuault<sup>1</sup>, Jingming Xin<sup>2</sup>, Jean-Charles Mazur<sup>1</sup>, Frédéric Prié<sup>2</sup>, Ilhem Bentaleb<sup>4</sup>, Elizabeth Webb<sup>5</sup>, Françoise Chalié<sup>1</sup>, Jacques Roy<sup>3</sup>.

<sup>1</sup> CEREGE UM34, Aix-Marseille Université, CNRS, IRD, INRA, Aix en Provence, France

<sup>2</sup> Laboratoire des Sciences du Climat et de l'Environnement (LSCE/IPSL/CEA/CNRS/UVSQ), Gif-sur-Yvette, France

<sup>3</sup> Ecotron Européen de Montpellier, UPS 3248, Centre National de la Recherche Scientifique (CNRS), Campus Baillarguet, Montferrier-sur-Lez, France

<sup>4</sup> ISEM, Université de Montpellier, CNRS, IRD, EPHE, Montpellier, France

<sup>5</sup> Department of Earth Sciences, The University of Western Ontario, London, Ontario, Canada

Correspondance: alexandre@cerege.fr

**Abstract**

Continental atmospheric relative humidity (RH) is a key climate-parameter. Combined with atmospheric temperature, it allows us to estimate the concentration of atmospheric water vapor which is one of the main components of the global water cycle and the most important gas contributing to the natural greenhouse effect. However, there is a lack of proxies suitable for reconstructing, in a quantitative way, past changes of continental atmospheric humidity. This reduces the possibility to make model-data comparisons necessary for the implementation of climate models. Over the past 10 years, analytical developments have enabled a few laboratories to reach sufficient precision for measuring the triple oxygen isotopes, expressed by the <sup>17</sup>O-excess ( $^{17}\text{O-excess} = \ln(\delta^{17}\text{O} + 1) - 0.528 \times \ln(\delta^{18}\text{O} + 1)$ ), in water, water vapor and minerals. The <sup>17</sup>O-excess represents an alternative to deuterium-excess for investigating relative humidity conditions that prevail during water evaporation. Phytoliths are micrometric amorphous silica particles that form continuously in living plants. Phytolith morphological assemblages from soils and sediments are commonly used as past vegetation and hydrous stress indicators. In the present study, we examine whether changes in atmospheric RH imprint the <sup>17</sup>O-excess of phytoliths in a measurable way and whether this imprint offers a potential for reconstructing past RH. For that purpose, we first monitored the <sup>17</sup>O-excess evolution of soil water, grass leaf water and grass phytoliths in response to changes in RH (from 40 to 100 %) in a growth chamber experiment where transpiration reached a steady state. Decreasing RH decreases the <sup>17</sup>O-excess of phytoliths by 4.1 per meg / % as a result of kinetic fractionation of the leaf water subject to evaporation. In order to model with accuracy the triple oxygen isotope fractionation in play in plant water and in phytoliths we recommend direct and continuous measurements of the triple isotope composition of water vapor. Then, we measured the <sup>17</sup>O-excess of 57 phytolith assemblages collected from top soils along a

RH and vegetation transect in inter-tropical West and Central Africa. Although scattered, the  $^{17}\text{O}$ -excess of phytoliths decreases with RH by 3.4 per meg / %. The similarity of the trends observed in the growth chamber and nature supports that RH is an important control of  $^{17}\text{O}$ -excess of phytoliths in the natural environment. However, other parameters such as changes in the triple isotope composition of the soil water or phytolith origin in the leaf tissue may come into play. Assessment of these parameters through additional growth chambers experiments and field campaigns will bring us closer to an accurate proxy of changes in relative humidity.

## 1 Introduction

Continental atmospheric relative humidity (RH) is a key climate-parameter. Combined with atmospheric temperature, it allows scientists to estimate the concentration of atmospheric water vapor which is one of the main components of the global water cycle and the most important gas contributing to the natural greenhouse effect (e.g. Held and Soden, 2000; Dessler and Davis, 2010; Chung et al., 2014). However, global climate models (GCMs) have difficulties to properly capture continental humidity conditions (Sherwood et al., 2010; Risi et al., 2012; Fischer and Knutti, 2013). Although tropospheric RH results from a subtle balance between different processes (including air mass origins and trajectories, large scale radiative subsidence, evaporation of falling precipitation, detrainment of convective system, evapotranspiration), it is usually depicted as rather constant in GCMs in agreement with thermodynamic coupling between atmospheric water vapor and sea surface temperature (Bony et al., 2006; Stevens et al., 2017). A model-data comparison approach is thus essential to progress on this issue. This approach has to be applicable beyond the instrumental period to make use of past changes in atmospheric water vapor conditions.

There are multiple ways to reconstruct past continental temperature and precipitation, for instance from pollen (Bartlein et al., 2010; Herbert and Harrison, 2016; Wahl et al., 2012) or tree ring data (Labuhn et al., 2016; Lavergne et al., 2017). However, there is a serious lack of proxies suitable for reconstructing, in a quantitative way, past variations in continental atmospheric RH. Indeed, the stable isotopes of oxygen and hydrogen ( $\delta^{18}\text{O}$  and  $\delta\text{D}$ ) of tree rings can be influenced by several parameters other than humidity (precipitation source, temperature). This limits the interpretation of tree ring isotope series in terms of humidity changes to places where variations of these other parameters are well constrained (Grießinger et al., 2016; Wernicke et al., 2015). A promising method relies on the  $\delta^{18}\text{O}$  and  $\delta\text{D}$  of plant biomarkers (e.g. n-alkanes and fatty acids from leaf waxes) recovered from soils (or buried soils) and sediments. It allows for an estimate in changes in plant water deuterium-excess ( $d\text{-excess} = \delta\text{D} - 8.0 \times \delta^{18}\text{O}$ ), linked to changes in precipitation sources and RH. This method under development can however be biased by factors other than climatic such as plant functional types and selective degradation of the biomarkers (e.g. Rach et al., 2017; Schwab et al., 2015; Tuthorn et al., 2015).

Phytoliths are micrometric amorphous silica ( $\text{SiO}_2$ ,  $\text{nH}_2\text{O}$ ) particles that form continuously in living plants. Silicon is actively absorbed by the roots (Ma and Yamaji, 2006) and is translocated in the plant tissues where it polymerizes inside the cells, in the cell walls and in extracellular spaces

of stems and leaves. Silica polymerization appears to be an active physiological process, which does not only depends on transpiration (Kumar et al., 2017). In grasses, which are well known silica accumulators, silica accounts for several % of dry weight (d.w.) and is mainly located in the stem and leaf epidermis. Phytolith morphological assemblages from soils and sediments are commonly used as past vegetation and hydrous stress indicators (e.g. Aleman et al., 2012; Backwell et al., 2014; Bremond et al., 2005a, 2005b; Contreras et al., 2014; Nogu   et al., 2017; Piperno, 2006). The potential of the  $\delta^{18}\text{O}$  signature of phytoliths ( $\delta^{18}\text{O}_{\text{Phyto}}$ ) from grasses for paleoclimate reconstruction has been investigated through growth chamber and North American Great Plains calibrations. It has been shown that the  $\delta^{18}\text{O}_{\text{Phyto}}$  of grass stems weakly affected by transpiration correlated with the  $\delta^{18}\text{O}$  signature of soil water ( $\delta^{18}\text{O}_{\text{SW}}$ ) and the atmospheric temperature, as expected for a polymerization of silica in isotope equilibrium with the plant water (Webb and Longstaffe, 2000, 2002, 2003, 2006). It has also been shown that  $\delta^{18}\text{O}_{\text{Phyto}}$  from grass leaves correlated with RH as expected for an evaporative kinetic isotope enrichment of the leaf water (e.g. Cernusak et al., 2016) imprinted on  $\delta^{18}\text{O}_{\text{Phyto}}$ . However, because grass stem and leaf phytoliths have the same morphology and are mixed in soil and sedimentary samples, these calibrations were not sufficient for using  $\delta^{18}\text{O}_{\text{Phyto}}$  of grassland phytolith assemblages as a paleoclimatic signal. In tropical trees, silica is found in leaves, bark and wood and accounts for a few % d.w. (e.g. Collura and Neumann, 2017). In the wood, silica polymerizes in the secondary xylem supposedly unaffected by transpiration, in the form of Globular granulate phytolith types (Madella et al., 2005; Scurfield et al., 1974; Welle, 1976). These phytoliths make up more than 80% of tropical humid forest and rainforest phytolith assemblages found in soils and sediments (Alexandre et al., 2013; Collura and Neumann, 2017; Scurfield et al., 1974; Welle, 1976). Examination of the  $\delta^{18}\text{O}_{\text{Phyto}}$  of rainforest assemblages showed correlations with the  $\delta^{18}\text{O}$  of precipitation ( $\delta^{18}\text{O}_{\text{Pre}}$ ) and the atmospheric temperature (Alexandre et al., 2012). However, in this case, the use of  $\delta^{18}\text{O}_{\text{Phyto}}$  did not further develop because it was applicable only to forested areas and humid climatic periods, which is a major drawback for paleoclimatic reconstructions.

The triple isotope composition of oxygen in the water molecule represents an alternative for investigating RH conditions prevailing during water evaporation. In the triple isotope system, the mass-dependent fractionation factors between A and B ( $^{17}\alpha_{\text{A-B}}$  and  $^{18}\alpha_{\text{A-B}}$ ) are related by the exponent  $\theta_{\text{A-B}}$  ( $^{17}\alpha_{\text{A-B}} = ^{18}\alpha_{\text{A-B}}^\theta$  or  $\theta_{\text{A-B}} = \ln ^{17}\alpha_{\text{A-B}} / \ln ^{18}\alpha_{\text{A-B}}$ ). The exponent can also be expressed as  $\theta_{\text{A-B}} = \Delta'^{17}\text{O}_{\text{A-B}} / \Delta'^{18}\text{O}_{\text{A-B}}$  with  $\Delta'^{17}\text{O}_{\text{A-B}} = \delta'^{17}\text{O}_{\text{A}} - \delta'^{17}\text{O}_{\text{B}}$ ,  $\Delta'^{18}\text{O}_{\text{A-B}} = \delta'^{18}\text{O}_{\text{A}} - \delta'^{18}\text{O}_{\text{B}}$ ,  $\delta'^{17}\text{O} = \ln(\delta^{17}\text{O} + 1)$  and  $\delta'^{18}\text{O} = \ln(\delta^{18}\text{O} + 1)$ . In the  $\delta'^{17}\text{O}$  vs  $\delta'^{18}\text{O}$  space,  $\lambda_{\text{A-B}}$  represents the slope of the data alignment during a mass-dependent fractionation process between A and B.  $\lambda_{\text{A-B}}$  is an empirical way to assess  $\theta_{\text{A-B}}$  (Li et al., 2017). It has been recently estimated that  $\theta$  equals 0.529 for liquid-vapor equilibrium ( $\theta_{\text{equil}}$ ; Barkan and Luz, 2005) and 0.518 for vapor diffusion in air (Barkan and Luz, 2007). It has additionally been shown that meteoric waters plot along a line with a slope  $\lambda$  of  $0.528 \pm 0.001$ . The departure from the meteoric water line is conventionally called  $^{17}\text{O}$ -excess ( $^{17}\text{O}$ -excess =  $\delta'^{17}\text{O} - 0.528 \times \delta'^{18}\text{O}$ ) (Luz and Barkan, 2010). In case of mass-dependent

fractionation processes, the magnitudes of the  $^{17}\text{O}$ -excess in waters and minerals are very small and measurement of the  $^{17}\text{O}$ -excess, expressed in per meg ( $10^{-3}\text{‰}$ ) vs VSMOW, requires very high analytical precisions.

In the water cycle, the  $^{17}\text{O}$ -excess variations mainly result from diffusion processes, while equilibrium fractionation does not lead to important departure from the meteoric water line. Theoretical and empirical estimations have shown that in contrast to d-excess, and except at very high latitudes, changes in water  $^{17}\text{O}$ -excess are not significantly impacted by temperature ( $\sim 0.1$  per meg /  $^{\circ}\text{C}$ ; Uemura et al., 2010) and much less sensitive to distillation processes (Angert et al., 2004; Barkan and Luz, 2007; Landais et al., 2008; Uemura et al., 2010; Steig et al., 2014). Changes in water  $^{17}\text{O}$ -excess are thus essentially controlled by evaporative kinetic fractionation. The  $^{17}\text{O}$ -excess decreases in the evaporating water and increases in the vapor phase when RH decreases at evaporative sites (e.g. sea surface, lake surface, soil surface or leaf surface). Over the last ten years, a few studies used the  $^{17}\text{O}$ -excess of water to interpret ice core archives in climatic terms (Guillevic et al., 2014; Schoeneman et al., 2014; Winkler et al., 2012; Landais et al., 2008, 2012). They supported that  $^{17}\text{O}$ -excess is a marker of RH, sea-ice extent at the moisture source, and air mass mixing (Risi et al., 2010) except at the very high latitudes of East Antarctica where temperature can have a significant influence. The observed variations of  $^{17}\text{O}$ -excess in Greenland ice cores of  $\sim 20$  per meg maximum were thus interpreted as variations of RH or sea-ice extent at the source region and coincide with variations in the low to mid latitude water cycle as recorded by other proxies (such as  $\text{CH}_4$  or  $\delta\text{D}$  of  $\text{CH}_4$ ) (Guillevic et al., 2014). An even smaller number of studies measured or attempted to model the  $^{17}\text{O}$ -excess of rainwater at low and temperate latitudes (Affolter et al., 2015; Landais et al., 2010b; Li et al., 2015; Luz and Barkan, 2010; Risi et al., 2013). The observed variations in  $^{17}\text{O}$ -excess, partly explained by convective processes and re-evaporation of precipitation, were of the order of 30–40 per meg, either during a rainy event or along climatic gradients. Only two studies focused on open surface waters, and showed that variations of the  $^{17}\text{O}$ -excess ranged from tens to hundreds of per meg when the surface water underwent strong evaporative enrichment (Surma et al., 2015; Luz and Barkan, 2010), in agreement with the Craig and Gordon (1965) formulation. The most important variations in  $^{17}\text{O}$ -excess occur at the plant-atmosphere interface. In leaf water, variations higher than 200 per meg were encountered (Landais et al., 2006; Li et al., 2017). Difference in  $^{17}\text{O}$ -excess between leaf water subject to evaporation (LW) and stem water (SW) not subject to evaporation, increased with decreasing RH (from 100 to 30 %), as expected for processes dominated by kinetic fractionation. When measuring a sequence of LW- SW couples sampled under different climatic conditions, the slope of the line linking their triple isotope composition and named  $\lambda_{\text{transp}}$ , equivalent to  $\theta_{\text{LW-SW}}$ , was found to change with RH. This pattern was neither influenced by the plant species nor by the environmental conditions (e.g. atmospheric temperature, soil water conditions) (Landais et al., 2006). However opposite trends of  $\lambda_{\text{transp}}$  with RH were observed from one study to another (Landais et al., 2006; Li et al., 2017). This discrepancy was attributed to the possibility that steady state is not always reached during sampling and to likely differences in isotope composition of the

247 ambient vapor, a parameter of the Craig and Gordon model that is often not measured but estimated  
248 (Li et al., 2017).

249 While  $^{17}\text{O}$ -excess measurements of waters were expanding, analyses of the triple oxygen isotope  
250 composition of minerals (mostly silicates and carbonates) were also developed, allowing estimate  
251 of fractionation during polymerization and providing constraints on both temperature and isotope  
252 composition of the water source (Pack and Herwartz, 2014; Levin et al., 2014; Passey et al., 2014;  
253 Herwartz et al., 2015; Miller et al., 2015; Sharp et al., 2016). Variations of  $^{17}\text{O}$ -excess of the order  
254 of tens to hundreds of per meg were reported from one mineral to another. For most of the studies  
255 cited above, the objective was to discriminate between high and low temperature formation  
256 processes or to decipher from which type of water the mineral formed (i.e. sea water, hydrothermal  
257 water, meteoric or surface water). The  $^{17}\text{O}$ -excess of biogenic and sedimentary carbonates was  
258 also investigated as a potential record of evaporating water sources (Passey et al., 2014). With  
259 regard to silicate-water fractionation, the relationship between the three oxygen isotopes defined  
260 by  $\theta_{\text{SiO}_2\text{-water}}$  was estimated between 0.521 and 0.528, increasing logarithmically with temperature  
261 (Sharp et al., 2016).

262 In the present study, in the light of the recent findings cited above, we examined whether changes  
263 in atmospheric RH imprint the  $^{17}\text{O}$ -excess of phytoliths ( $^{17}\text{O}$ -excess<sub>Phyto</sub>) in a measurable way and  
264 whether this imprint offers a potential for reconstructing past RH. For that purpose, we first  
265 monitored the  $^{17}\text{O}$ -excess evolution of soil water, grass leaf water and grass phytoliths in response  
266 to changes in RH in a growth chamber experiment. Then, we measured the  $^{17}\text{O}$ -excess<sub>Phyto</sub> from  
267 57 phytolith assemblages collected in soil tops along a RH and vegetation transect in inter-tropical  
268 West and Central Africa. Relationships between  $^{17}\text{O}$ -excess<sub>Phyto</sub> and RH were looked for and  
269 assessed on the basis of previous quantifications of kinetic isotope enrichment of leaf water and  
270 equilibrium fractionation between water and silica. Results from the natural sampling were  
271 compared to the ones from the growth chamber experiment to evaluate the importance of RH in  
272 controlling  $^{17}\text{O}$ -excess<sub>Phyto</sub> in natural environment.

## 273 **2 Materials and methods**

### 274 **2.1 Samples from the growth chamber experiment**

275 *Festuca arundinacea*, commonly referred to as tall fescue, is widely distributed globally as forage  
276 and an invasive grass species (Gibson and Newman, 2001) and can adapt to a wide range of  
277 conditions. In 2016, *F. arundinacea* (Callina RAGT Semences) was grown in three chambers  
278 under three conditions of RH (ca. 40, 60 and 80 %) kept constant using wet air introduction and  
279 ultrasonic humidifier. We checked that the humidifiers did not lead to any isotope fractionation  
280 between the water in their reservoirs and the vapor delivered. Temperature and light intensity were  
281 kept constant at  $25 \pm 0.6$  (SD) °C and  $293 \pm 14$  (SD) mmol / m<sup>2</sup> / sec respectively.

282 In a 35 L tank (53 x 35 x 22 cm), 20 kg of dried commercial potting soil were packed above a 1.6  
283 cm layer of quartz gravel. A porous cup for water extraction was placed in the soil with its  
284 extraction tube hermetically extending outside of the tank walls. The soil was irrigated with 10 L



of the same water as the one used for the humidifier. Four grams of seeds were sown along four rows in each tank, resulting in about 6000 seedlings. Each tank was then placed in a chamber and was irrigated from a Mariotte bottle (25 L) placed next to it. The Mariotte system was set so that a water saturated level of 5 cm remained constant at the base of the tank. The irrigation water was supplemented with 105 mg/L of SiO<sub>2</sub> (in the form of SiO<sub>2</sub> K<sub>2</sub>O). Ten days after germination, agar-agar (polysaccharide agarose) was spread on the soil surface around the seedlings (about 8 cm tall), to prevent any evaporation (Alexandre et al., 2016).

A fourth tank was kept at 100% of RH thanks to the installation of a 20 cm high plexiglass cover, in a forth chamber set at 80 % of RH. In this case no agar-agar was added and the vapor around *F. arundinacea* came from evaporation and transpiration of the soil water. Otherwise the treatment was the same as in the other chambers.

For each humidity condition, three to four harvests were made at intervals of 10-14 days. The 20-25 cm long leaves were cut at two cm above the soil level and weighed. From the first to the fourth sampling, the harvested wet leaves increased from 15-20 g (10 days of growth) to 40-60 g (14 days of growth). Three to five g of leaves were put in glass gastight vials and kept frozen for bulk leaf water extraction. The remaining leaves were dried for phytolith extraction. Forty mL of irrigation water from the Mariotte bottle, and of soil water from the porous cup, were kept at 5°C before analyses.

After each harvest, the tanks were left in their chamber of origin but the 40, 60 and 80 % RH treatments were rotated between the growth chambers so that the four replicates of a given RH treatment would come from at least two different chambers. The 100 % humidity was set up in a unique chamber during the entire duration of the experiment. The harvested leaves in this treatment were often covered by condensation drops which were blotted between two sheets of wiping paper, rapidly after harvesting. The experimental setup details and the harvest list are given in table 1.

## 2.2 Samples from the natural climate transects

Fifty-seven top soil samples were collected during several field trips along vegetation and humidity transects in Mauritania and Senegal (Bremond et al., 2005b ; Lézine, 1988; Pasturel, 2015) (Lezine, 1988) Gabon (Lebamba et al., 2009) and Congo (Alexandre et al., 1997) in the saharian, sahelian, sudanian, guinean and congolian bioclimatic zones, respectively (White et al., 1983). Samplings, phytolith extractions and phytolith morphological assemblages descriptions are given in the above-mentioned studies, except for the samples of Gabon from which phytoliths were chemically treated and counted in the frame of the present study.

The sampled site location as well as the associated climatic and oxygen isotope variables are given in Table 2. The vegetation overlying the sampled soils was categorized into savanna (Mauritania, Senegal), wooded savanna (Senegal), humid forest (Gabon and Congo) and enclosed savanna (Gabon). For each sampled site, yearly climate average were calculated from the monthly means of temperature, precipitation, RH and diurnal temperature, extracted from the Climate Research Unit (CRU) 1961 - 1990 time series (10' spatial resolution; <http://www.cru.uea.ac.uk>, Harris et al.,

2013, CRU 2.0). Mean Annual Precipitation (MAP), Mean Annual Temperature (MAT) and mean annual RH range from 49 to 2148 mm, 24.3 to 29.8 °C and 40.2 to 82.5 %, respectively. In addition, in order to get a proxy of RH during wet months, likely those of the grass growing season, averaged RH monthly means for months with at least one day with precipitation higher than 0.1 mm (RH-rd0>1) was calculated. It ranges from 56.3 to 82.5 %. As maximum transpiration is supposed to be reached around 15:00 UTC we also calculated RH and RH-rd0>1 at 15:00 (RH15 and RH15-rd0>1, respectively) according to New et al. (2002) and Kriticos et al. (2012). For each sampling site, estimates of  $\delta^{18}\text{O}$  of precipitation for the months with at least one day with precipitation higher than 0.1 mm ( $\delta^{18}\text{O}_{\text{Pre-rd0>1}}$ ) were calculated from  $\delta^{18}\text{O}$  of precipitation extracted from The Online Isotopes in Precipitation Calculator-version OIPC2-2 (<http://www.waterisotopes.org>; Bowen and Revenaugh, 2003; Bowen and Wilkinson, 2002; Bowen et al., 2005) and weighted by the amount of precipitation. The estimates range from -1.515 to -4.464 ‰. There is currently no data on the  $^{17}\text{O}$ -excess of precipitation ( $^{17}\text{O}\text{-excess}_{\text{Pre}}$ ) at these sites.

### 2.3 Phytolith chemical extractions

Phytoliths from soils were extracted following Crespin et al. (2008) using HCl, H<sub>2</sub>O<sub>2</sub>, C<sub>6</sub>H<sub>5</sub>Na<sub>3</sub>O<sub>7</sub> and Na<sub>2</sub>O<sub>4</sub>S<sub>3</sub>-H<sub>2</sub>O at 70 °C, and a ZnBr<sub>2</sub> heavy liquid separation. It has been shown that up to a temperature of 70 °C the extraction has no effect on the  $\delta^{18}\text{O}$  (Crespin et al., 2008). We verified that it did not have any effect on the  $^{17}\text{O}$ -excess either, using our internal standard MSG extracted at 60 and 70°C (Crespin et al., 2008). The obtained  $^{17}\text{O}$ -excess values were similar (-211 and -243 per meg, respectively) given our reproducibility of  $\pm 34$  per meg (see section 2.6.1). Phytoliths from *Festuca arundinaceae* were thus extracted using a high purity protocol with HCl, H<sub>2</sub>SO<sub>4</sub>, H<sub>2</sub>O<sub>2</sub>, HNO<sub>3</sub>, KClO<sub>3</sub> and KOH at 70 °C following Corbineau et al. (2013).

### 2.4 Phytolith counting

Phytolith assemblages from the humidity transects were mounted on microscope slides in Canada Balsam, for counting, at a 600X magnification. More than 200 identifiable phytoliths with a diameter greater than 5  $\mu\text{m}$  and with a taxonomic significance were counted per sample. Three repeated counting gave an error of  $\pm 3.5$  % (SD). Phytoliths were named using the International Code for Phytolith Nomenclature 1.0 (Madella et al., 2005) and categorized as Globular granulate type produced by the wood (Scurfield et al., 1974; Kondo et al., 1994), palm Globular echinate type and grass types comprising Acicular, Bulliform, Elongate psilate, Elongate echinate, Bulliform cells, and Grass Short Cells types. For each sample from the natural transects, the phytolith index d/p, a proxy of tree cover density (Alexandre and Bremond, 2009; Bremond et al., 2005a), was calculated. It is the ratio of Globular granular phytolith category (Madella et al., 2005) formed in the secondary xylem of the dicotyledon (d) wood to the grass short cell phytolith category formed in the epidermis of grasses or Poideae (p) (Collura and Neumann, 2017; Scurfield et al., 1974; Welle, 1976). Those two categories make up most of the phytolith assemblages recovered from inter-tropical soils (Alexandre et al., 1997, 2013; Bremond et al., 2005b, 2005a).

Phytolith assemblages from the *F. arundinacea* samples were also mounted and counted. The phytolith types were categorized according to their cell of origin in the epidermis into Epidermal short cell, Epidermal long cell, Bulliform cell and Hair acicular.

## **2.5 Leaf and soil water extraction**

Leaf water was extracted using a distillation line. Leaves were introduced in a glass tube connected to the distillation line, and frozen through immersion of the glass tube in liquid nitrogen. While keeping the sample frozen, the distillation line was pumped to reach a vacuum higher than  $5 \cdot 10^{-2}$  mbar. The pumping system was then isolated and the glass sample tube warmed to 80°C. Meanwhile, at the other end of the distillation line, a glass collecting tube was immersed in liquid nitrogen to trap the extracted water. To avoid condensation, the line between the sample tube and the collection tube was heated with a heating wire. The distillation was completed after six hours. In order to remove volatiles from the extracted water, a few granules of activated charcoal were added and the water slowly stirred for 12 h.

Soil water was extracted using a 31mm porous ceramic cup. Brown or yellow-colored samples were filtered at 0.22µm, but remained colored after filtration, indicating the presence of soluble compounds.

## **2.6 Isotope analyses**

The oxygen isotope results are expressed in the standard  $\delta$ -notation relative to VSMOW.

### **2.6.1 Phytoliths**

Phytolith samples of 1.6 mg were dehydrated and dehydroxylated under a flow of N<sub>2</sub> (Chapligin et al., 2010) and oxygen extraction was performed using the IR Laser-Heating Fluorination Technique at CEREGE (Aix-en-Provence, France) (Alexandre et al., 2006, Crespin et al., 2008; Suavet et al., 2010). The purified oxygen gas (O<sub>2</sub>) was passed through a -114 °C slush to refreeze gases interfering with the mass 33 (e.g. NF), potentially produced during the fluorination of residual organic N, before being sent to the dual-inlet mass spectrometer (ThermoQuest Finnigan Delta Plus). The composition of the reference gas was determined through the analyses of NBS28 for which isotope composition has been set to  $\delta^{18}\text{O}=9.60$  ‰,  $\delta^{17}\text{O}=4.99$  ‰ and  $^{17}\text{O}$ -excess = -65 per meg. During the measurement period, reproducibility (SD) of the analyses of the working quartz standard (Boulangé 2008) against which the isotope composition of the sample gas was corrected on a daily basis (3 quartz standards were analysed per day) was  $\pm 0.20$  ‰,  $\pm 0.11$  ‰ and  $\pm 22$  per meg for  $\delta^{18}\text{O}$ ,  $\delta^{17}\text{O}$  and  $^{17}\text{O}$ -excess respectively (n = 63; one run of eight dual inlet measurements). For every session of measurement, the effectiveness of the entire dehydration and IR-Laser-Fluorination-IRMS procedure was checked through the analysis of a working phytolith standard (MSG60) with  $\delta^{18}\text{O} = 36.90 \pm 0.78$  ‰,  $\delta^{17}\text{O} = 19.10 \pm 0.40$  ‰ and  $^{17}\text{O}$ -excess = -215  $\pm$  34 per meg (n = 29). For comparison, the inter-laboratory pooled value for MSG60 is  $\delta^{18}\text{O} = 37.0 \pm 0.8$  ‰ (Chapligin et al., 2011). Recent measurements of the silicate reference materials UWG-2 garnet (Valley et al., 1995) and San Carlos (SC) olivine gave the following values:  $\delta^{18}\text{O}_{\text{UWG-2}} = 5.72 \pm 0.12$  ‰,  $\delta^{17}\text{O}_{\text{UWG-2}} = 2.95 \pm 0.06$  ‰,  $^{17}\text{O}$ -excess<sub>UWG-2} = -68  $\pm$  27 per meg (n = 5),  $\delta^{18}\text{O}_{\text{SC}} =$</sub>

4.95 ± 0.22 ‰,  $\delta^{17}\text{O}_{\text{SC}} = 2.56 \pm 0.12$  ‰,  $^{17}\text{O}\text{-excess}_{\text{SC}} = -49 \pm 24$  per meg (n = 3). For comparison, silicate analyses presented in Sharp et al. (2016) are normalized to a  $\delta^{18}\text{O}$  value for San Carlos Olivine of 5.3 ‰ and a  $^{17}\text{O}\text{-excess}$  value of -54 per meg. As previously discussed in Suavet et al. (2010), a large scatter is often observed for SC olivine  $\delta^{18}\text{O}$  and  $\delta^{17}\text{O}$  values measured in a given laboratory or from a laboratory to another. This is probably attributable to the heterogeneity of the analyzed samples. At CEREGE, the internal standard of SC olivine is prepared from a number of millimetric crystals with possibly different oxygen isotope composition. The  $\delta^{18}\text{O}$  and  $\delta^{17}\text{O}$  values from Suavet et al. (2010), Tanaka and Nakamura (2013) Pack et al. (2016), Sharp et al. (2016) and the present study average  $5.29 \pm 0.23$  (1 SD) ‰ and  $2.72 \pm 0.12$  (1 SD) ‰, respectively. Nevertheless, despite the large SD on  $^{18}\text{O}$  and  $\delta^{17}\text{O}$  measurements, the SC olivine  $^{17}\text{O}\text{-excess}$  appears relatively constant ( $-71 \pm 23$  (1 SD)) per meg.

## 2.6.2 Leaf water

Leaf water was analyzed at LSCE (Gif sur Yvette, France) following the procedure previously detailed in Landais et al. (2006). In summary, a fluorination line was used to convert water to oxygen using  $\text{CoF}_3$  heated at 370°C in a helium flow. The oxygen was then trapped in a tube immersed in liquid helium before being analyzed by dual inlet IRMS (ThermoQuest Finnigan Delta V mass spectrometer) against a reference oxygen gas. All measurements were run against a working  $\text{O}_2$  standard calibrated against VSMOW. The resulting precisions (2 runs of 16 dual inlet measurements) were 0.02 ‰ for both  $\delta^{17}\text{O}$  and  $\delta^{18}\text{O}$  and 5 per meg for  $^{17}\text{O}\text{-excess}$ .

## 2.6.3 Irrigation and soil waters

Irrigation and soil water were analyzed at the Ecotron of Montpellier (France) with an isotope laser analyzer (Picarro L2140i) operated in  $^{17}\text{O}\text{-excess}$  mode using an auto-sampler and a high precision vaporizer. Each water sample was used to fill three vials randomly dispatched in four groups of six samples (three replicates per sample). Each sample group was bracketed by three working standards (Giens-1, Iceberg-1 and Eco-1). Ten injections were performed for each vial, and the results of the first six injections were discarded to account for memory effects. Following IAEA recommendations (IAEA, 2013), each liquid measurement sequence was started with two vials of deionized water for instrument conditioning.

The isotope compositions of each sample group were calibrated using the three interpolated mean values obtained for the bracketing working standards (Delattre et al., 2015). All isotope ratios were normalized on the VSMOW2/SLAP2 scale, with an assigned SLAP2  $^{17}\text{O}\text{-excess}$  value of zero, following the recommendations of Schoenemann et al. (2013). The resulting precisions (3 replicates) were 0.02 ‰, 0.01 ‰ and 10 per meg for  $\delta^{17}\text{O}$ ,  $\delta^{18}\text{O}$  and  $^{17}\text{O}\text{-excess}$  (n=31).

The three working standards were also analyzed using the fluorination/IRMS technique used for leaf water analyses at LSCE. The  $^{17}\text{O}\text{-excess}$  maximum difference was 6.4 per meg, which is lower than the analytical precision obtained using the laser spectrometer (Table S1a).

In order to assess that soluble organic compounds present in some soil water samples did not impact the laser analyzer isotope measurements (Martín-Gómez et al., 2015), a representative set

of colored samples were analyzed with and without the Picarro micro combustion module (MCM) set up between the high precision vaporizer and the analyzer inlet. This system was designed to partly remove organic volatile compounds using a catalytic process. The obtained isotope compositions were not significantly different (Table S1b), suggesting that organic compounds were either in low concentration, and/or did not interfere in the spectral window used by the analyzer. Therefore, the other soil water samples were analyzed without the MCM.

### 3 Results

#### 3.1 Growth chamber experiment

$\delta^{18}\text{O}$  and  $^{17}\text{O}$ -excess of the irrigation water (respectively  $\delta^{18}\text{O}_{\text{IW}}$  and  $^{17}\text{O}$ -excess<sub>IW</sub>) average  $-5.59 \pm 0.006\text{‰}$  and  $26 \pm 5$  per meg, respectively.  $\delta^{18}\text{O}$  and  $^{17}\text{O}$ -excess of the soil water (respectively  $\delta^{18}\text{O}_{\text{SW}}$  and  $^{17}\text{O}$ -excess<sub>SW</sub>) average  $-2.89 \pm 0.19\text{‰}$  and  $16 \pm 8$  per meg, respectively (table S2). The isotope difference is thus significant for  $\delta^{18}\text{O}$ , less significant for  $^{17}\text{O}$ -excess, according to the analytical error. Although evaporative kinetic fractionation of the top soil water suctioned by the porous cup under vacuum cannot be ruled out, isotopic exchanges between the soil water and oxygen-bearing phases of the rhizosphere may also have impacted the soil water isotopic composition (Bowling et al., 2017; Chen et al., 2016; Oerter et al., 2014; Orlowski et al., 2016). Hereinafter, we consider the isotope signatures of the water absorbed by the roots of *F. arundinacea* to be equivalent to the irrigation water that fed the saturation level at the base of the tank. This water was reached by the deepest roots, as observed on a cross-section of the soil after the end of the experiment, and likely reached the upper roots by capillarity.

The transpiration of *F. arundinacea* increases rapidly from 0.03 to 0.6 L / day from 100 to 60 % RH and more slowly from 60 to 40 % RH where it reaches 0.61 L / day (averages of the replicates, Table 1). In response to decreasing RH,  $\delta^{18}\text{O}$  (table S2) and  $^{17}\text{O}$ -excess (fig. 1a) values of the bulk leaf water ( $\delta^{18}\text{O}_{\text{LW}}$  and  $^{17}\text{O}$ -excess<sub>LW</sub>) show clear increasing and decreasing trends, respectively. The averaged  $^{18}\text{O}$ -enrichment of bulk leaf water relatively to irrigation water ( $\Delta^{18}\text{O}_{\text{LW-IW}}$ ) increases from 100 to 60 % of RH and seems to be stabilizing from 60 to 40 % RH (fig. 1b; Table 1). For 100 % RH, the high standard deviations (SD) associated with  $\delta^{18}\text{O}_{\text{LW}}$  (table S2), and consequently with  $\Delta^{18}\text{O}_{\text{LW-IW}}$  (Table 1), are due to the very high  $\delta^{18}\text{O}_{\text{LW}}$  value of sample P3-100-10-05-16. However, as we do not have any explanation for this high value, this data was not excluded from further calculation. The  $^{17}\text{O}$ -excess values associated with the enrichment  $\Delta^{18}\text{O}_{\text{LW-IW}}$  (or  $^{17}\text{O}$ -excess<sub>e LW-IW</sub> =  $\Delta^{17}\text{O}_{\text{LW-IW}} - 0.528 \times \Delta^{18}\text{O}_{\text{LW-IW}}$ ) are scattered for a given RH. The averaged value however follows a clear pattern (fig. 1c; table 1): it decreases slowly from 100 to 80 % RH (from  $-88 \pm 48$  to  $-75 \pm 20$  per meg,) and more rapidly from 80 to 40% RH where it reaches  $-159 \pm 9$  per meg. When the relationship is linearized, the slope of the line between  $^{17}\text{O}$ -excess<sub>e LW-IW</sub> and 40 to 80 % RH is 2.3 per meg/% (fig. 1f). The raw values of  $\theta_{\text{LW-IW}}$  do not show any significant trend with RH and average  $0.519 \pm 0.002$ . The slope  $\lambda_{\text{LW-IW}}$  of the line linking  $\Delta^{17}\text{O}_{\text{LW-IW}}$  and  $\Delta^{18}\text{O}_{\text{LW-IW}}$  (table 1) is 0.518.

The average phytolith content ranges from 1.1 to 0.1% d.w. Silicification of the leaf blade of *F.*



*arundinacea* increases with increasing transpiration and decreasing humidity (Table 1). Phytolith morphological identification shows that they formed preferentially in the epidermal short cell and to a smaller extent in the epidermal long cells (fig. 2). The proportion of silicified long cells, increases with increasing transpiration and decreasing RH (Table 1). Some hair and bulliform cells were also silicified, but in much smaller quantities.  $\delta^{18}\text{O}$  and  $^{17}\text{O}$ -excess of phytoliths ( $\delta^{18}\text{O}_{\text{Phyto}}$  and  $^{17}\text{O}\text{-excess}_{\text{Phyto}}$  respectively) show the same general trends with RH as  $\delta^{18}\text{O}_{\text{LW}}$  and  $^{17}\text{O}\text{-excess}_{\text{LW}}$  (fig. 1a, table S2).

The average value of the  $^{18}\text{O}$ -enrichment of phytoliths relative to the bulk leaf water ( $\Delta^{18}\text{O}_{\text{Phyto-LW}}$ ) increases slowly (from  $27.97 \pm 6.97$  to  $28.47 \pm 0.38\text{‰}$ ) when RH decreases from 100 to 80 % and more rapidly from 80 to 40% where it reaches  $32.32 \pm 1.92 \text{‰}$  (fig. 1b, Table 1). With regard to the enrichment of phytoliths relative to the irrigation water,  $\Delta^{18}\text{O}_{\text{Phyto-IW}}$  shows the same trend with RH as  $\Delta^{18}\text{O}_{\text{LW-IW}}$  (fig. 1b, table 1).  $^{17}\text{O}\text{-excess}_{\text{e Phyto-IW}}$  shows the same decreasing trend with RH as  $^{17}\text{O}\text{-excess}_{\text{e LW-IW}}$  (fig. 1c, Table 1). When the relationship is linearized, the slope of the line between  $^{17}\text{O}\text{-excess}_{\text{e Phyto-IW}}$  and 40 to 80 % RH is 4.3 per meg/% (fig. 1f). A Student's t-test (relevant when the variance of two data sets are equal; Andrade and Estévez-Pérez, 2014), calculated on the  $^{17}\text{O}\text{-excess}_{\text{e LW-IW}}$  vs RH and  $^{17}\text{O}\text{-excess}_{\text{e Phyto-IW}}$  vs RH data sets shows that the slopes of the lines are not statistically different for a 75% confidence interval. Thus, the link between  $^{17}\text{O}\text{-excess}_{\text{e Phyto-IW}}$  and RH is mainly due to the leaf water  $^{17}\text{O}$ -excess dependency to RH. The raw values of  $\theta_{\text{Phyto-LW}}$  appears constant, averaging  $0.52 \pm 0.001$  (table 1).

### 3.2 Natural samples

Values of  $\delta^{18}\text{O}_{\text{Phyto}}$  and  $^{17}\text{O}\text{-excess}_{\text{Phyto}}$  range respectively from 23.79 to 38.16 ‰ and from -140 to -290 per meg (table 2). The variations are in the same order of magnitude as for the growth chamber experiment. The estimates of  $\delta^{18}\text{O}_{\text{Pre}}$  vary little along the sampled transect (from -4.46 to -3.22 ‰). No relationship is observed between  $\delta^{18}\text{O}_{\text{Phyto}}$  or the  $^{18}\text{O}$ -enrichment of phytoliths relatively to precipitation ( $\Delta^{18}\text{O}_{\text{Phyto-Pre}}$ ) and MAP, MAT or RH (fig. 3, table 2).

Although scattered, the  $^{17}\text{O}\text{-excess}_{\text{Phyto}}$  values show a significant positive linear correlation with RH (fig. 4), regardless of which RH variable is taken into account. After excluding two outliers, the slopes of the correlation lines are 2.1 and 2.2 when RH and RH15 are taken into account, 3.4 when either RH-rd0>1 or RH15-rd0>1 are considered. The relationship obtained between  $^{17}\text{O}\text{-excess}_{\text{Phyto}}$  and RH-rd0>1 (i.e. RH of the wet months) is the closest to the one obtained between  $^{17}\text{O}\text{-excess}_{\text{Phyto}}$  and RH in the growth chambers (fig. 4b). It can be expressed as follows (Eq.3):

$$^{17}\text{O}\text{-excess}_{\text{phyto}} = 3.4 \times (\text{RH-rd0}>1) - 460 \quad (r^2 = 0.48; p < 0.001) \quad \text{Eq. 1}$$

where  $^{17}\text{O}\text{-excess}_{\text{phyto}}$  is expressed in per meg vs VSMOW and RH in %.

The excluded outliers (Table 3) are RIM1 and C3L4. RIM1 presents a very low  $^{17}\text{O}$ -excess (-305 per meg) relative to the  $^{17}\text{O}$ -excess of the samples with close RH-rd0>1, i.e. from 71 to 74 % (average of  $-237 \pm 32$  per meg for 82-78, 83-116 and 83-115). C3L4 is located next to C4L3 and under similar averaged RH but presents a  $^{17}\text{O}$ -excess higher by 133 per meg. RIM1 and C3L4

show morphological patterns very similar to the other assemblages with the same range of RH. Thus, the discrepancies may lie either in the fact that local RH variations may not be reflected in RH averaged estimates for 10' ( $\approx 185 \text{ km}^2$ ) or in the particularity of the isotope composition of the local soil water (see discussion below).

The phytolith index d/p ranges from 0.01 to 0.08 in savanna, from 0.14 to 0.49 in wooded savanna, from 0.76 to 1.58 in enclosed savanna and from 1.84 to 6.78 in humid forests (Table 2). This unambiguous increase of d/p with tree cover density is in agreement with previous calibrations performed for the West African area (Bremond et al., 2005b). Interestingly, under high RH conditions, humid forest and enclosed savanna that are characterized by a large range of d/p represent a small range of  $^{17}\text{O}$ -excess. Conversely, under lower RH conditions, savanna and wooded savanna that are characterized by a small range of d/p represent a large range of  $^{17}\text{O}$ -excess (fig.5). This absence of relationship between  $^{17}\text{O}$ -excess and tree cover density is also mirrored in figure 4 where phytolith samples from different vegetation types (i.e. savanna vs wooded savanna or humid forests vs enclosed savanna), that have developed under the same RH conditions, have the same range of  $^{17}\text{O}$ -excess.

## **4 Discussion**

### **4.1 Imprint of changes in atmospheric RH on the $^{17}\text{O}$ -excess of leaf water**

In the bulk leaf water, the trends observed between  $\Delta^{18}\text{O}_{\text{LW-IW}}$  or  $^{17}\text{O}\text{-excess}_{\text{LW-IW}}$  and RH are in agreement with an evaporative kinetic fractionation that increases when RH decreases, as expected from previous studies on the  $\delta^{18}\text{O}$  or  $^{17}\text{O}$ -excess evolution of leaf water (e.g. Cernusak et al., 2016; Landais et al., 2006; Li et al., 2017). The obtained values of  $\theta_{\text{LW-IW}}$  average (0.519) and of  $\lambda_{\text{LW-IW}}$  (0.518) are respectively close and similar to the value of  $\theta_{\text{diff}}$  calculated for the diffusion of vapor in air (0.518; Barkan and Luz, 2007). As schematically described in Landais et al. (2016),  $\lambda_{\text{transp}}$  (equivalent to  $\lambda_{\text{LW-IW}}$ ) represents the interplay among three processes in the leaf boundary layer: 1) the equilibrium fractionation, which is only temperature-dependent (Majoube, 1971) and drives the isotope composition of leaf water along the equilibrium water line ( $\theta_{\text{equil}} = 0.529$ ); 2) the diffusion transport leading to increasing kinetic fractionation with decreasing relative humidity along the diffusion line; 3) the isotope exchange of leaf water with atmospheric water vapor, decreasing from turbulent to laminar and molecular leaf boundary layer vapor transport conditions (e.g. Buhay et al., 1996). In the case of the growth chamber experiment, the fact that  $\theta_{\text{LW-IW}}$  and  $\lambda_{\text{LW-IW}}$  are respectively close and similar to  $\theta_{\text{diff}}$  supports that the increasing diffusion of vapor in air when RH decreases or transpiration increases is the main process controlling the evolution of  $^{17}\text{O}\text{-excess}_{\text{LW}}$ . At high humidity (80-100% RH), the kinetic fractionation likely reaches its minimum as the diffusion process becomes limited.

The  $\delta^{18}\text{O}_{\text{LW}}$  is commonly modelled as a function of the isotope composition of absorbed water, the isotope composition of water vapor, and RH (Craig and Gordon, 1965). The Craig and Gordon simple approach overestimates  $\delta^{18}\text{O}_{\text{LW}}$  and different corrections have been proposed to take into account the diffusion of the evaporating water back to the leaf lamina and the advection of less

evaporated stem water (i.e. the Péclet effect, Buhay et al., 1996; Helliker and Ehleringer, 2000; Roden et al., 2000; Farquhar and Gan, 2003; Farquhar and Cernusak, 2005; Ripullone et al., 2008; Treydte et al., 2014). In the growth chamber experiment, where water availability, relative humidity, and temperature were kept constant, we assume that transpiration rapidly reached a steady state and that the isotope composition of transpired water was the same as that of the irrigation water entering the plant (e.g. Welp et al., 2008). A tentative estimate of the theoretical value of  $\Delta^{18}\text{O}_{\text{LW-IW}}$ ,  $\Delta^{17}\text{O}_{\text{LW-IW}}$  and  $^{17}\text{O-excess}_{\text{e LW-IW}}$  was performed using the equations proposed for  $^{18}\text{O}$ -enrichment by Cernusak et al. (2016) (table S3). For calculating the  $\Delta^{17}_{\text{LW-IW}}$  we used for the equilibrium and kinetic fractionations (respectively  $^{17}\alpha_{\text{eq}}$  and  $^{17}\alpha_{\text{k}}$  in table S3)  $^{17}\alpha_{\text{eq}} = ^{18}\alpha_{\text{eq}}^{0.529}$  and  $^{17}\alpha_{\text{k}} = ^{18}\alpha_{\text{k}}^{0.518}$ . As expected, the predicted  $\Delta^{18}\text{O}_{\text{LW-IW}}$  values were all higher than the observed values by several ‰. Helliker and Ehleringer (2000) proposed, for monocotyledonous species characterized by a vertical parallel veinal structure, to use instead of the Craig and Gordon model the Gat and Bowser (1991) equation describing the movement of water through a sequence of pools in series. However this model would further increase the estimates of  $\Delta^{18}\text{O}_{\text{LW-IW}}$ . The predicted  $^{17}\text{O-excess}_{\text{e}}$  displayed in Table S3 was either higher or lower than the observed  $^{17}\text{O-excess}_{\text{e LW-IW}}$ . Predicted  $\theta_{\text{LW-IW}}$  increased with RH from 0.521 to 0.529 which is far from the observed values averaging 0.519. The predicted value of 0.529 at 100 % RH reflects pure equilibrium in a situation where irrigation water and water vapor are assumed to have similar isotope composition since irrigation water is directly vaporized into the chamber (table S3), without any fractionation. Sensitivity tests show that regardless of the model chosen (Buhay et al., 1996; Cernusak et al., 2016; Li et al., 2017), estimations of  $\theta_{\text{LW-IW}}$  are very dependant on the isotope compositions of the water vapor (Li et al., 2017), not measured either in our experiment or in previous studies (Landais et al., 2006; Li et al., 2017). In the natural environment, a first order approximation for the isotope composition of water vapor is to consider equilibrium with precipitation. As a result of water-vapor equilibrium fractionation and soil water  $^{18}\text{O}$ -enrichment, this can lead to a water vapor  $^{18}\text{O}$ -depleted by 10-13 ‰ compared to the soil water (Landais et al., 2006; Lehmann et al., 2018). In this case the predicted  $\lambda_{\text{transp}}$  (equivalent to  $\lambda_{\text{LW-SW}}$ ) decreases with increasing humidity. Finally, because wrong values of the isotope compositions of the water vapor may affect significantly the calculation of  $\Delta^{18}\text{O}_{\text{LW-IW}}$ ,  $\Delta^{17}\text{O-excess}_{\text{e LW-IW}}$  and  $\theta_{\text{LW-SW}}$ , we call for vapor isotope measurements as a prerequisite to accurately model the leaf water triple oxygen isotope evolution with RH. However, overall, despite the uncertainties on the predicted evolution of  $\lambda_{\text{LW-SW}}$  or  $\theta_{\text{LW-SW}}$  with RH, the predicted value of  $^{17}\text{O-excess}_{\text{e LW-IW}}$  decreases when RH increases, which is also observed, as well as reflected in the triple isotope composition of phytoliths, as discussed below.

## 4.2 Imprint of changes in atmospheric RH on the $^{17}\text{O}$ -excess of phytoliths

Polymerization of silica is supposed to occur in isotope equilibrium with the forming-water, and therefore, to be only governed by temperature and the isotope composition of the forming water. Almost a dozen temperature-dependant relationships have been empirically established between the  $\delta^{18}\text{O}$  of quartz, sinters, cherts, diatoms or phytoliths and the  $\delta^{18}\text{O}$  of their forming water



( $\delta^{18}\text{O}_{\text{PhytoFW}}$ ). Although the obtained fractionation coefficients are close (from -0.2 to -0.4 ‰ °C<sup>-1</sup>), the range of fractionation ( $\Delta^{18}\text{O}_{\text{Phyto-PhytoFW}}$ ) is large (see synthesis in Alexandre et al., 2012). The  $\Delta^{18}\text{O}_{\text{Phyto-LW}}$  values obtained in the frame of the growth chamber experiment (ranging from  $27.9 \pm 7.2$  to  $32.3 \pm 2.2$ ‰) encompass the  $\Delta^{18}\text{O}_{\text{Phyto-PhytoFW}}$  of 31.1‰ calculated from the Dodd and Sharp (2010) relationship for 25°C. It is lower than the values of 36.4 and 36 ‰ at 25 °C, calculated from Sharp et al. (2016) and Alexandre et al. (2012). Whereas Alexandre et al. (2012) and Sharp et al. (2016) generally estimated the forming-water  $\delta^{18}\text{O}$  values, Dodd and Sharp (2010) measured the  $\delta^{18}\text{O}$  values of the water samples. The proximity of the obtained range of  $\Delta^{18}\text{O}_{\text{Phyto-LW}}$  values to the  $\Delta^{18}\text{O}_{\text{Phyto-PhytoFW}}$  calculated from Dodd and Sharp (2010) suggests that phytoliths formed in equilibrium with a water of isotope composition close to that of the bulk leaf water. This is additionally supported by the obtained averaged value of  $\theta_{\text{Phyto-LW}}$  ( $0.522 \pm 0.001$ ) close to the  $\theta_{\text{SiO}_2\text{-water}}$  equilibrium value of 0.524 calculated for 25 °C from Sharp et al. (2016).

Evolution of the triple isotope composition of bulk leaf water and phytoliths can be illustrated by plotting  $\delta^{17}\text{O}$  vs  $\delta^{18}\text{O}$ , or  $^{17}\text{O}$ -excess vs  $\delta^{18}\text{O}$  (fig. 6) which is more appropriate to evidence small variations. Figure 6 shows that the leaf water evolved from the irrigation water pool, becomes increasingly subject to kinetic fractionation when RH decreased. This evolution follows a single leaf water line reflecting  $\lambda_{\text{LW-IW}} = 0.518$  or  $\theta = 0.519$  (Table1). Then, if phytoliths polymerized from the bulk leaf waters, at 25°C, according to a constant equilibrium fractionation, their expected isotope signature should follow a line parallel to the leaf water line. This is the case for phytoliths formed at RH higher than 40%. However, the isotope signature of phytoliths formed at 40% RH suggest a forming water more evaporated than the bulk leaf water. The Péclet effect, which is known to scale with transpiration (e.g. Barnard et al., 2007) can explain this discrepancy. Advection of less evaporated stem water may decrease  $\delta^{18}\text{O}_{\text{LW}}$  and increase  $^{17}\text{O}$ -excess<sub>LW</sub> relative to  $\delta^{18}\text{O}$  and  $^{17}\text{O}$ -excess of the epidermal water prone to evaporation and from which phytoliths formed. At this point, the data scattering prevents further discussion but the possibility that when RH is low, or when transpiration is high, the phytolith forming-water is different from the bulk leaf water must be investigated in future research developments.

With regard to the natural samples, whereas no relationship was found between  $\delta^{18}\text{O}_{\text{phyto}}$  and RH, a clear positive linear dependency of  $^{17}\text{O}$ -excess<sub>phyto</sub> to RH was shown, equivalent to 2.1 per meg / % when the annual RH average was taken into account, or to 3.4 per meg / % when the average of the growing season (RH-rd0>1) was taken into account (fig. 4). These coefficients are close to the slope of the lines obtained for the growth chamber experiment between  $^{17}\text{O}$ -excess<sub>Phyto</sub>,  $^{17}\text{O}$ -excess<sub>e LW-IW</sub> and  $^{17}\text{O}$ -excess<sub>e Phyto-IW</sub> and 80 to 40% RH (fig. 1d, e and f). This consistency represents a major positive step in examining whether changes in atmospheric RH imprint the  $^{17}\text{O}$ -excess of natural phytolith assemblages in a predictable way. Without taking into account the two outliers, the linear regression between RH-rd0>1 and  $^{17}\text{O}$ -excess<sub>phyto</sub> for a 95% confidence interval can be expressed as follows:

$$\text{RH-rd0>1} = 0.14 \pm 0.02 \text{ (S.E)} \times ^{17}\text{O-excess}_{\text{phyto}} + 100.5 \pm 4.7 \text{ (S.E)} \quad \text{Eq. 2}$$

where  $^{17}\text{O-excess}_{\text{phyto}}$  is expressed in per meg and RH in %,  $r^2 = 0.48$ , and  $p < 0.001$ . S.E. stands for standard error. The S.E. of the predicted  $\text{RH-rd0}>1$  value is  $\pm 5.6\%$ . However, the data scattering (fig. 4) call for assessing additional parameters that can contribute to changes in  $^{17}\text{O-excess}_{\text{phyto}}$ , beside RH, before using the  $^{17}\text{O-excess}_{\text{phyto}}$  for quantitative RH reconstruction.

One can expect that the isotope composition of the soil water taken-up by the roots impacts  $^{17}\text{O-excess}_{\text{phyto}}$ . In tropical dry and humid areas, evaporative kinetic fractionation can lead to a  $^{18}\text{O}$ -enrichment of the soil water of several ‰, in the first dm depth (e.g. Gaj et al., 2016; Liu et al., 2010). Spatial variability in the composition of the rainfall feeding the upper soil water may also intervene. However, the amount-weighted values of  $\delta^{18}\text{O}_{\text{Pre}}$  along the sampled transect vary little (Table 2). With regard to  $^{17}\text{O-excess}$ , changes in soil water evaporation rather than the small variations expected for  $^{17}\text{O-excess}_{\text{Pre}}$  (Landais et al., 2010b; Li et al., 2015) should impact the evolution of  $^{17}\text{O-excess}_{\text{phyto}}$ , although, here, the lack of measurements only allow for speculation.

The vegetation type and the plant part from which phytoliths come from may also bring some noise to the relationship between  $^{17}\text{O-excess}_{\text{phyto}}$  and RH. In grasses, leaf water is expected to be more prone to evaporative enrichment than stem water, and inside the leaf itself, the heterogeneity of evaporative sites repartition and water movements can lead to a significant heterogeneity in the  $\delta^{18}\text{O}$  signatures of water and phytoliths (Cernusak et al., 2016; Helliker and Ehleringer, 2000; Webb and Longstaffe, 2002). Soil top phytolith assemblages likely record several decades of annual phytolith production and their isotope composition is expected to be an average. This would explain the consistency of the  $^{17}\text{O-excess}_{\text{phyto}}$  data obtained from bulk grass from climate chambers and bulk grasses from natural savannas. However, further investigation on the extent of the heterogeneity of  $^{17}\text{O-excess}$  signature of water and phytoliths in mature grasses would help to clarify the links between water and phytolith signatures and better understand the phytolith proxy. In trees, the Globular granulate phytolith is assumed to come from the non-transpiring secondary xylem of the wood. Thus Globular granulate phytoliths should present an isotope signature closer to that of the soil water, or less impacted by kinetic fractionation than grass phytoliths. However, for a given range of RH, samples with significant representations of both phytolith categories (i.e wooded savanna and enclosed savanna samples with d/p from 0.1 to 1.6) present  $^{17}\text{O-excess}$  values close to the values obtained by samples with very low or very high d/p (figs. 4 and 5). To further assess the significance of the Globular granulate isotope signature, we calculated  $\delta^{18}\text{O}_{\text{PhytoFW}}$  values (Table 2) using the Dodd and Sharp (2010) fractionation factor and compared it to the precipitation-weighted  $\delta^{18}\text{O}_{\text{Pre-rd0}>1}$  average. For the humid forest assemblages,  $\delta^{18}\text{O}_{\text{PhytoFW}}$  values are higher than  $\delta^{18}\text{O}_{\text{Pre-rd0}>1}$  by  $4.6 \pm 1.5$  ‰. This difference is larger than the range of  $^{18}\text{O}$ -enrichment observed for the upper 10 cm depth of soil water under tropical humid forests (2-3‰; Liu et al., 2008; Stahl et al., 2013), suggesting that evaporative isotope signatures of both soils and leaf water imprinted the Globular granulate phytolith type. This is in line with recent  $^{18}\text{O}$ -labelling experiment showing that the  $^{18}\text{O}$ -enriched oak phloem water may exchange with xylem water under low transpiration rates (Lehmann et al., 2018). Complementary examination of the isotope signature of phytolith assemblages from forests growing under different RH conditions (i.e dry forests, humid forests, rainforests), as well as further investigation of the anatomical origin of the

Globular granulate phytolith type are now required to further discuss the meaning of the  $^{17}\text{O}$ -excess signal brought by wooded savanna and tropical forest phytolith assemblages.

Biases due to the calibration methodology may also be responsible for the data scattering. Imperfect adequacy between the space scales recorded by the soil top phytolith assemblages and the RH variables may come into play. Phytolith assemblages represent a mixture of local and wind-transported phytoliths. In the open saharian, sahelian and soudanian zones of West Africa the winter low altitude north-easterly trade winds may transport phytoliths southward, reducing differences between assemblages from different biogeographic zones and increasing differences among assemblages of a given biogeographic zone (Bremond et al., 2005b). Additional samples from other geographic zones are thus needed to increase the robustness of the relationship. With regard to the recorded time scales, the CRU RH 30 years averages are in agreement with the several decades of phytolith production.

## 5 Conclusion

The present combination of growth chamber and *in situ* transect calibrations lay the groundwork for further examination of the robustness of the  $^{17}\text{O}$ -excess<sub>Phyto</sub> as a proxy of changes in RH. The growth chamber experiment demonstrated that change in RH imprints  $^{17}\text{O}$ -excess<sub>Phyto</sub> (by 4.1 per meg / % between 40 and 80% RH) or the  $^{17}\text{O}$ -excess<sub>e Phyto-IW</sub> (by 4.3 per meg / %, between 40 and 80% RH) through its imprint on  $^{17}\text{O}$ -excess<sub>e LW-IW</sub>. As the isotope composition of the irrigation water was stable, and transpiration likely reached a steady state, the positive correlation between  $^{17}\text{O}$ -excess<sub>LW</sub> and RH was only governed by the kinetic fractionation occurring in the leaf epidermis water subject to evaporation, as supported by the value of  $\theta_{\text{LW-IW}}$  of 0.517, close to  $\theta_{\text{diff}}$ .

In order to model the triple oxygen isotope fractionation in play at the soil/plant/atmosphere interface we require direct and continuous measurements of the triple isotope composition of water vapor. Such measurements should develop in the near futur through the use of isotope ratio infrared analyzers (e.g. Berkelhammer et al., 2013; Schmidt et al., 2010). We also suggest to constrain as much as possible the isotope composition of the soil water taken up by the roots. Stem water is usually used as an analogue of soil water when modelling  $\delta^{17}\text{O}_{\text{LW}}$  and  $\delta^{18}\text{O}_{\text{LW}}$  (Landais et al., 2006; Li et al., 2017). However, in the stem, water in the phloem that is bidirectional (moves up and down the plant's stem) receives the contribution of evaporating leaf water, and water in the xylem that is unidirectional (moves up the plant's stem) may exchange with phloem waters (Lehmann et al., 2018). Consequently one may expect the isotope composition of stem water to be slightly different than that of soil water (Berkelhammer et al., 2013; Treydte et al., 2014).

When plotting  $^{17}\text{O}$ -excess<sub>Phyto</sub> vs RH, the samples collected along the West and Central African relative humidity transect define a correlation coefficient ranging from 2.1 to 3.4 per meg / % (depending on the RH variable taken into account) and lay close to the growth chamber  $^{17}\text{O}$ -excess<sub>Phyto</sub> line. This supports that RH is an important control of  $^{17}\text{O}$ -excess<sub>Phyto</sub> in natural environment, even if phytolith assemblages come from different vegetation types. However, other parameters such as changes in the triple isotope composition of the soil water, vegetation source

or imperfect adequation between the space scales recorded by the soil top phytolith assemblages and the RH variables may come into play and explain the scattering of  $^{17}\text{O}$ -excess<sub>Phyto</sub>. Assessment of these parameters through additional growth chambers experiments and field campaigns will bring us closer to an accurate proxy of changes in relative humidity.

### *Acknowledgements*

This study was supported by the French program INSU-LEFE and benefited from the CNRS human and technical resources allocated to the ECOTRONS Research Infrastructures as well as from the state allocation ‘Investissements d’Avenir’ ANR-11-INBS-0001.

### **References**

- Affolter, S., Häuselmann, A.D., Fleitmann, D., Häuselmann, P., and Leuenberger, M. (2015). Triple isotope ( $\delta\text{D}$ ,  $\delta^{17}\text{O}$ ,  $\delta^{18}\text{O}$ ) study on precipitation, drip water and speleothem fluid inclusions for a Western Central European cave (NW Switzerland). *Quat. Sci. Rev.* 127, 73–89.
- Alexandre, A., and Brémond, L. (2009). Comment on the paper in Quaternary International: “Methodological concerns for analysis of phytolith assemblages: Does count size matter?” (C.A.E. Strömberg). *Quat. Int.* 193, 141–142.
- Alexandre, A., Meunier, J.-D., Colin, F., and Koud, J.-M. (1997). Plant impact on the biogeochemical cycle of silicon and related weathering processes. *Geochim. Cosmochim. Acta* 61, 677–682.
- Alexandre, A., Crespin, J., Sylvestre, F., Sonzogni, C., and Hilbert, D.W. (2012). The oxygen isotopic composition of phytolith assemblages from tropical rainforest soil tops (Queensland, Australia): validation of a new paleoenvironmental tool. *Clim. Past* 8, 307–324.
- Alexandre, A., Balesdent, J., Cazevieuille, P., Chevassus-Rosset, C., Signoret, P., Mazur, J.-C., Harutyunyan, A., Doelsch, E., Basile-Doelsch, I., Mische, H., et al. (2016). Direct uptake of organically derived carbon by grass roots and allocation in leaves and phytoliths:  $^{13}\text{C}$  labeling evidence. *Biogeosciences* 13, 1693–1703.
- Alexandre, A.E., Pailles, C., Sonzogni, C., Kershaw, P., Wust, R.A., and Turney, C.S. (2013).  $\delta^{18}\text{O}$  signature of phytoliths from the last interglacial Lynch’s Crater sediments (Qld, Australia): insights on changes in precipitation sources. *AGU Fall Meet. Abstr.* 33.
- Andrade, J.M., and Estévez-Pérez, M.G. (2014). Statistical comparison of the slopes of two regression lines: A tutorial. *Anal. Chim. Acta* 838, 1–12.
- Angert, A., Rachmilevitch, S., Barkan, E., and Luz, B. (2003). Effects of photorespiration, the cytochrome pathway, and the alternative pathway on the triple isotopic composition of atmospheric  $\text{O}_2$ . *Glob. Biogeochem. Cycles* 17, 1030.
- Angert, A., Cappa, C.D., and DePaolo, D.J. (2004). Kinetic  $\text{O}$ -17 effects in the hydrologic cycle: Indirect evidence and implications. *Geochim. Cosmochim. Acta* 68, 3487–3495.
- Backwell, L.R., McCarthy, T.S., Wadley, L., Henderson, Z., Steininger, C.M., Bonita deKlerk, Barré, M., Lamothe, M., Chase, B.M., Woodborne, S., et al. (2014). Multiproxy record of late Quaternary climate change and Middle Stone Age human occupation at Wonderkrater, South Africa. *Quat. Sci. Rev.* 99, 42–59.
- Barkan, E., and Luz, B. (2005). High precision measurements of  $^{17}\text{O}/^{16}\text{O}$  and  $^{18}\text{O}/^{16}\text{O}$  ratios in  $\text{H}_2\text{O}$ . *Rapid Commun. Mass Spectrom.* 19, 3737–3742.

748 Barkan, E., and Luz, B. (2007). Diffusivity fractionations of H<sub>2</sub>(16)O/H<sub>2</sub>(17)O and  
 749 H<sub>2</sub>(16)O/H<sub>2</sub>(18)O in air and their implications for isotope hydrology. *Rapid Commun. Mass*  
 750 *Spectrom. RCM* 21, 2999–3005.  
 751 Barnard, R.L., Salmon, Y., Kodama, N., Sörgel, K., Holst, J., Rennenberg, H., Gessler, A., and  
 752 Buchmann, N. (2007). Evaporative enrichment and time lags between delta18O of leaf water and  
 753 organic pools in a pine stand. *Plant Cell Environ.* 30, 539–550.  
 754 Bartlein, P.J., Harrison, S.P., Brewer, S., Connor, S., Davis, B. a. S., Gajewski, K., Guiot, J.,  
 755 Harrison-Prentice, T.I., Henderson, A., Peyron, O., et al. (2010). Pollen-based continental  
 756 climate reconstructions at 6 and 21 ka: a global synthesis. *Clim. Dyn.* 37, 775–802.  
 757 Berkelhammer, M., Hu, J., Bailey, A., Noone, D.C., Still, C.J., Barnard, H., Gochis, D., Hsiao,  
 758 G.S., Rahn, T., and Turnipseed, A. (2013). The nocturnal water cycle in an open-canopy forest.  
 759 *J. Geophys. Res. Atmospheres* 118, 10,225–10,242.  
 760 Bony, S., Colman, R., Kattsov, V.M., Allan, R.P., Bretherton, C.S., Dufresne, J.L., Hall, A.,  
 761 Hallegatte, S., Holland, M.M., Ingram, W., et al. (2006). How well do we understand and  
 762 evaluate climate change feedback processes? *J. Clim.* 19, 3445–3482.  
 763 Bowen, G.J., and Revenaugh, J. (2003). Interpolating the isotopic composition of modern  
 764 meteoric precipitation. *Water Resour. Res.* 39, 1299.  
 765 Bowen, G.J., and Wilkinson, B. (2002). Spatial distribution of  $\delta^{18}\text{O}$  in meteoric precipitation.  
 766 *Geology* 30, 315–318.  
 767 Bowen, G.J., Wassenaar, L.I., and Hobson, K.A. (2005). Global application of stable hydrogen  
 768 and oxygen isotopes to wildlife forensics. *Oecologia* 143, 337–348.  
 769 Bowling, D.R., Schulze, E.S., and Hall, S.J. (2017). Revisiting streamside trees that do not use  
 770 stream water: can the two water worlds hypothesis and snowpack isotopic effects explain a  
 771 missing water source? *Ecohydrology* 10, n/a-n/a.  
 772 Bremond, L., Alexandre, A., Hely, C., and Guiot, J. (2005a). A phytolith index as a proxy of tree  
 773 cover density in tropical areas: Calibration with Leaf Area Index along a forest-savanna transect  
 774 in southeastern Cameroon. *Glob. Planet. Change* 45, 277–293.  
 775 Bremond, L., Alexandre, A., Peyron, O., and Guiot, J. (2005b). Grass water stress estimated  
 776 from phytoliths in West Africa. *J. Biogeogr.* 32, 311–327.  
 777 Bremond, L., Alexandre, A., Peyron, O., and Guiot, J. (2005c). Grass water stress estimated from  
 778 phytoliths in West Africa. *J. Biogeogr.* 32, 311–327.  
 779 Buhay, W.M., Edwards, T.W.D., and Aravena, R. (1996). Evaluating kinetic fractionation  
 780 factors used for reconstructions from oxygen and hydrogen isotope ratios in plant water and  
 781 cellulose. *Geochim. Cosmochim. Acta* 60, 2209–2218.  
 782 Cernusak, L.A., Barbour, M.M., Arndt, S.K., Cheesman, A.W., English, N.B., Feild, T.S.,  
 783 Helliker, B.R., Holloway-Phillips, M.M., Holtum, J.A.M., Kahmen, A., et al. (2016). Stable  
 784 isotopes in leaf water of terrestrial plants. *Plant Cell Environ.* 39, 1087–1102.  
 785 Chaplignin, B., Leng, M.J., Webb, E., Alexandre, A., Dodd, J.P., Ijiri, A., Lücke, A., Shemesh,  
 786 A., Abelman, A., Herzsuh, U., et al. (2011). Inter-laboratory comparison of oxygen isotope  
 787 compositions from biogenic silica. *Geochim. Cosmochim. Acta* 75, 7242–7256.  
 788 Chen, G., Auerswald, K., and Schnyder, H. (2016). 2H and 18O depletion of water close to  
 789 organic surfaces. *Biogeosciences* 13, 3175–3186.  
 790 Chung, E.-S., Soden, B., Sohn, B.J., and Shi, L. (2014). Upper-tropospheric moistening in  
 791 response to anthropogenic warming. *Proc. Natl. Acad. Sci.* 111, 11636–11641.  
 792 Collura, L.V., and Neumann, K. (2017). Wood and bark phytoliths of West African woody  
 793 plants. *Quat. Int.* 434, Part B, 142–159.

Contreras, D.A., Robin, V., Gonda, R., Hodara, R., Dal Corso, M., and Makarewicz, C. (2014).  
 (Before and) After the Flood: A multiproxy approach to past floodplain usage in the middle  
 Wadi el-Hasa, Jordan. *J. Arid Environ.* *110*, 30–43.  
 Crespin, J., Alexandre, A., Sylvestre, F., Sonzogni, C., Paillès, C., and Garreta, V. (2008). IR  
 laser extraction technique applied to oxygen isotope analysis of small biogenic silica samples.  
*Anal. Chem.* *80*, 2372–2378.  
 Delattre, H., Vallet-Coulomb, C., and Sonzogni, C. (2015). Deuterium excess in atmospheric  
 water vapor of a Mediterranean coastal wetland: regional versus local signatures. *Atmos Chem*  
*Phys Discuss* *15*, 1703–1746.  
 Dessler, A.E., and Davis, S.M. (2010). Trends in tropospheric humidity from reanalysis systems.  
*J. Geophys. Res. Atmospheres* *115*, D19127.  
 Dodd, J.P., and Sharp, Z.D. (2010). A laser fluorination method for oxygen isotope analysis of  
 biogenic silica and a new oxygen isotope calibration of modern diatoms in freshwater  
 environments. *Geochim. Cosmochim. Acta* *74*, 1381–1390.  
 Evaristo, J., Jasechko, S., and McDonnell, J.J. (2015). Global separation of plant transpiration  
 from groundwater and streamflow. *Nature* *525*, 91–94.  
 Farquhar, G.D., and Cernusak, L.A. (2005). On the isotopic composition of leaf water in the non-  
 steady state. *Funct. Plant Biol.* *32*, 293–303.  
 Farquhar, G.D., and Gan, K.S. (2003). On the progressive enrichment of the oxygen isotopic  
 composition of water along a leaf. *Plant Cell Environ.* *26*, 801–819.  
 Fischer, E.M., and Knutti, R. (2013). Robust projections of combined humidity and temperature  
 extremes. *Nat. Clim. Change* *3*, 126–130.  
 Gaj, M., Beyer, M., Koeniger, P., Wanke, H., Hamutoko, J., and Himmelsbach, T. (2016). In situ  
 unsaturated zone water stable isotope ( $2\text{H}$  and  $18\text{O}$ ) measurements in semi-arid environments: a  
 soil water balance. *Hydrol. Earth Syst. Sci.* *20*, 715–731.  
 Gat, J., and Bowser, C. (1991). Stable Isotope Geochemistry: A Tribute to Samuel Epstein (The  
 Geochemical Society Special Publication No. 3).  
 Gázquez, F., Mather, I., Rolfe, J., Evans, N.P., Herwartz, D., Staubwasser, M., and Hodell, D.A.  
 (2015). Simultaneous analysis of  $17\text{O}/16\text{O}$ ,  $18\text{O}/16\text{O}$  and  $2\text{H}/1\text{H}$  of gypsum hydration water by  
 cavity ring-down laser spectroscopy. *Rapid Commun. Mass Spectrom.* *29*, 1997–2006.  
 Griesbinger, J., Bräuning, A., Helle, G., Hochreuther, P., and Schleser, G. (2016). Late Holocene  
 relative humidity history on the southeastern Tibetan plateau inferred from a tree-ring  $\delta 18\text{O}$   
 record: Recent decrease and conditions during the last 1500 years. *Quat. Int.*  
 Guillevic, M., Bazin, L., Landais, A., Stowasser, C., Masson-Delmotte, V., Blunier, T., Eynaud,  
 F., Falourd, S., Michel, E., Minster, B., et al. (2014). Evidence for a three-phase sequence during  
 Heinrich Stadial 4 using a multiproxy approach based on Greenland ice core records. *Clim Past*  
*10*, 2115–2133.  
 Held, I.M., and Soden, B.J. (2000). Water Vapor Feedback and Global Warming. *Annu. Rev.*  
*Energy Environ.* *25*, 441–475.  
 Helliker, B.R., and Ehleringer, J.R. (2000). Establishing a grassland signature in veins:  $18\text{O}$  in  
 the leaf water of C3 and C4 grasses. *Proc. Natl. Acad. Sci. U. S. A.* *97*, 7894–7898.  
 Herbert, A.V., and Harrison, S.P. (2016). Evaluation of a modern-analogue methodology for  
 reconstructing Australian palaeoclimate from pollen. *Rev. Palaeobot. Palynol.* *226*, 65–77.  
 Herwartz, D., Pack, A., Krylov, D., Xiao, Y., Muehlenbachs, K., Sengupta, S., and Rocco, T.D.  
 Proceedings of the National Academy of Sciences.  
 IAEA (2013). A Laboratory Information Management System for Stable Hydrogen and Oxygen

840 Isotopes in Water Samples by Laser Absorption Spectroscopy. User Manual & Tutorial.  
 841 Kriticos, D.J., Webber, B.L., Leriche, A., Ota, N., Macadam, I., Bathols, J., and Scott, J.K.  
 842 (2012). CliMond: global high-resolution historical and future scenario climate surfaces for  
 843 bioclimatic modelling. *Methods Ecol. Evol.* 3, 53–64.  
 844 Kumar, S., Milstein, Y., Bami, Y., Elbaum, M., and Elbaum, R. (2017). Mechanism of silica  
 845 deposition in sorghum silica cells. *New Phytol.* 213, 791–798.  
 846 Labuhn, I., Daux, V., Girardclos, O., Stievenard, M., Pierre, M., and Masson-Delmotte, V.  
 847 (2015). French summer droughts since 1326 AD: a reconstruction based on tree ring cellulose  
 848  $\delta^{18}\text{O}$ . *Clim Past Discuss* 11, 5113–5155.  
 849 Labuhn, I., Daux, V., Girardclos, O., Stievenard, M., Pierre, M., and Masson-Delmotte, V.  
 850 (2016). French summer droughts since 1326 CE: a reconstruction based on tree ring cellulose  
 851  $\delta^{18}\text{O}$ . *Clim Past* 12, 1101–1117.  
 852 Landais, A., Barkan, E., Yakir, D., and Luz, B. (2006). The triple isotopic composition of  
 853 oxygen in leaf water. *Geochim. Cosmochim. Acta* 70, 4105–4115.  
 854 Landais, A., Barkan, E., and Luz, B. (2008). Record of  $\delta^{18}\text{O}$  and  $17\text{O}$ -excess in ice from Vostok  
 855 Antarctica during the last 150,000 years. *Geophys. Res. Lett.* 35, L02709.  
 856 Landais, A., Dreyfus, G., Capron, E., Masson-Delmotte, V., Sanchez-Goni, M.F., Desprat, S.,  
 857 Hoffmann, G., Jouzel, J., Leuenberger, M., and Johnsen, S. (2010a). What drives the millennial  
 858 and orbital variations of  $\delta^{18}\text{O}_{\text{atm}}$ ? *Quat. Sci. Rev.* 29, 235–246.  
 859 Landais, A., Risi, C., Bony, S., Vimeux, F., Descroix, L., Falourd, S., and Bouygues, A. (2010b).  
 860 Combined measurements of  $17\text{O}$ excess and d-excess in African monsoon precipitation:  
 861 Implications for evaluating convective parameterizations. *Earth Planet. Sci. Lett.* 298, 104–112.  
 862 Laverne, A., Daux, V., Villalba, R., Pierre, M., Stievenard, M., and Srur, A.M. (2017).  
 863 Improvement of isotope-based climate reconstructions in Patagonia through a better  
 864 understanding of climate influences on isotopic fractionation in tree rings. *Earth Planet. Sci. Lett.*  
 865 459, 372–380.  
 866 Lezine, A.M. (1988). New pollen data from the Sahel, Senegal. In *Review of Palaeobotany and*  
 867 *Palynology*, (Elsevier), pp. 141–154.  
 868 Li, S., Levin, N.E., and Chesson, L.A. (2015). Continental scale variation in  $17\text{O}$ -excess of  
 869 meteoric waters in the United States. *Geochim. Cosmochim. Acta* 164, 110–126.  
 870 Li, S., Levin, N.E., Soderberg, K., Dennis, K.J., and Caylor, K.K. (2017). Triple oxygen isotope  
 871 composition of leaf waters in Mpala, central Kenya. *Earth Planet. Sci. Lett.* 468, 38–50.  
 872 Liu, W., Liu, W., Li, P., Duan, W., and Li, H. (2010). Dry season water uptake by two dominant  
 873 canopy tree species in a tropical seasonal rainforest of Xishuangbanna, SW China. *Agric. For.*  
 874 *Meteorol.* 150, 380–388.  
 875 Liu, W.J., Liu, W.Y., Li, J.T., Wu, Z.W., and Li, H.M. (2008). Isotope variations of throughfall,  
 876 stemflow and soil water in a tropical rain forest and a rubber plantation in Xishuangbanna, SW  
 877 China. *Hydrol. Res.* 39, 437–449.  
 878 Luz, B., and Barkan, E. (2010). Variations of  $17\text{O}/16\text{O}$  and  $18\text{O}/16\text{O}$  in meteoric waters.  
 879 *Geochim. Cosmochim. Acta* 74, 6276–6286.  
 880 Ma, J.F., and Yamaji, N. (2006). Silicon uptake and accumulation in higher plants. *Trends Plant*  
 881 *Sci.* 11, 392–397.  
 882 Ma, J.F., Tamai, K., Yamaji, N., Mitani, N., Konishi, S., Katsuhara, M., Ishiguro, M., Murata,  
 883 Y., and Yano, M. (2006). A silicon transporter in rice. *Nature* 440, 688–691.  
 884 Madella, M., Alexandre, A., Ball, T., Group, I.W., and others (2005). International code for  
 885 phytolith nomenclature 1.0. *Ann. Bot.* 96, 253–260.

886 Majoube, M. (1971). Fractionnement en oxygène 18 et en deutérium entre l'eau et sa vapeur. *J.*  
887 *Chim. Phys.* *68*, 1423–1436.

888 Martín-Gómez, P., Barbeta, A., Voltas, J., Peñuelas, J., Dennis, K., Palacio, S., Dawson, T.E.,  
889 and Ferrio, J.P. (2015). Isotope-ratio infrared spectroscopy: a reliable tool for the investigation of  
890 plant-water sources? *New Phytol.* *207*, 914–927.

891 Miller, M.F. (2002). Isotopic fractionation and the quantification of  $^{17}\text{O}$  anomalies in the oxygen  
892 three-isotope system: an appraisal and geochemical significance. *Geochim. Cosmochim. Acta*  
893 *66*, 1881–1889.

894 Miller, M.F., Greenwood, R.C., and Franchi, I.A. (2015). Comment on “The triple oxygen  
895 isotope composition of the Earth mantle and understanding  $\Delta^{17}\text{O}$  variations in terrestrial rocks  
896 and minerals” by Pack and Herwartz [*Earth Planet. Sci. Lett.* *390* (2014) 138–145].  
897 *ResearchGate* *418*.

898 New, M., Lister, D., Hulme, M., and Makin, I. (2002). A high-resolution data set of surface  
899 climate over global land areas. *Clim. Res.* *21*, 1–25.

900 Oerter, E., Finstad, K., Schaefer, J., Goldsmith, G.R., Dawson, T., and Amundson, R. (2014).  
901 Oxygen isotope fractionation effects in soil water via interaction with cations (Mg, Ca, K, Na)  
902 adsorbed to phyllosilicate clay minerals. *J. Hydrol.* *515*, 1–9.

903 Orłowski, N., Pratt, D.L., and McDonnell, J.J. (2016). Intercomparison of soil pore water  
904 extraction methods for stable isotope analysis. *Hydrol. Process.* *30*, 3434–3449.

905 Pack, A., and Herwartz, D. (2014). The triple oxygen isotope composition of the Earth mantle  
906 and understanding variations in terrestrial rocks and minerals. *Earth Planet. Sci. Lett.* *390*, 138–  
907 145.

908 Passey, B.H., Hu, H., Ji, H., Montanari, S., Li, S., Henkes, G.A., and Levin, N.E. (2014). Triple  
909 oxygen isotopes in biogenic and sedimentary carbonates. *Geochim. Cosmochim. Acta* *141*, 1–25.

910 Piperno, D.R. (2006). *Phytoliths: A Comprehensive Guide for Archaeologists and*  
911 *Paleoecologists* (Rowman Altamira).

912 Ripullone, F., Matsuo, N., Stuart-Williams, H., Wong, S.C., Borghetti, M., Tani, M., and  
913 Farquhar, G. (2008). Environmental Effects on Oxygen Isotope Enrichment of Leaf Water in  
914 Cotton Leaves. *Plant Physiol.* *146*, 729–736.

915 Risi, C., Landais, A., Bony, S., Jouzel, J., Masson-Delmotte, V., and Vimeux, F. (2010).  
916 Understanding the  $^{17}\text{O}$  excess glacial-interglacial variations in Vostok precipitation. *J. Geophys.*  
917 *Res. Atmospheres* *115*, D10112.

918 Risi, C., Landais, A., Winkler, R., and Vimeux, F. (2013). Can we determine what controls the  
919 spatio-temporal distribution of d-excess and  $^{17}\text{O}$ -excess in precipitation using the LMDZ  
920 general circulation model? *Clim Past* *9*, 2173–2193.

921 Schmidt, M., Maseyk, K., Lett, C., Biron, P., Richard, P., Bariac, T., and Seibt, U. (2010).  
922 Concentration effects on laser-based  $\delta^{18}\text{O}$  and  $\delta^2\text{H}$  measurements and implications for the  
923 calibration of vapour measurements with liquid standards. *Rapid Commun. Mass Spectrom.* *24*,  
924 3553–3561.

925 Schwab, V.F., Garcin, Y., Sachse, D., Todou, G., Séné, O., Onana, J.-M., Achoundong, G., and  
926 Gleixner, G. (2015). Effect of aridity on  $\delta^{13}\text{C}$  and  $\delta\text{D}$  values of  $\text{C}_3$  plant- and  $\text{C}_4$  graminoid-  
927 derived leaf wax lipids from soils along an environmental gradient in Cameroon (Western  
928 Central Africa). *Org. Geochem.* *78*, 99–109.

929 Scurfield, G., Anderson, and Segnit (1974). Silica in woody stems. *Aust. J. Bot* *22*, 211–229.

930 Sharp, Z.D., Gibbons, J.A., Maltsev, O., Atudorei, V., Pack, A., Sengupta, S., Shock, E.L., and  
931 Knauth, L.P. (2016). A calibration of the triple oxygen isotope fractionation in the  $\text{SiO}_2\text{--H}_2\text{O}$



932 system and applications to natural samples. *Geochim. Cosmochim. Acta* 186, 105–119.  
 933 Sherwood, S.C., Ingram, W., Tsushima, Y., Satoh, M., Roberts, M., Vidale, P.L., and O’Gorman,  
 934 P.A. (2010). Relative humidity changes in a warmer climate. *J. Geophys. Res. Atmospheres* 115,  
 935 D09104.  
 936 Stahl, C., Hérault, B., Rossi, V., Burban, B., Bréchet, C., and Bonal, D. (2013). Depth of soil  
 937 water uptake by tropical rainforest trees during dry periods: does tree dimension matter?  
 938 *Oecologia* 173, 1191–1201.  
 939 Steig, E.J., Gkinis, V., Schauer, A.J., Schoenemann, S.W., Samek, K., Hoffnagle, J., Dennis,  
 940 K.J., and Tan, S.M. (2014). Calibrated high-precision  $^{17}\text{O}$ -excess measurements using cavity  
 941 ring-down spectroscopy with laser-current-tuned cavity resonance. *Atmospheric Meas. Tech.* 7,  
 942 2421–2435.  
 943 Suavet, C., Alexandre, A., Franchi, I.A., Gattacceca, J., Sonzogni, C., Greenwood, R.C., Folco,  
 944 L., and Rochette, P. (2010). Identification of the parent bodies of micrometeorites with high-  
 945 precision oxygen isotope ratios. *Earth Planet. Sci. Lett.* 293, 313–320.  
 946 Treydte, K., Boda, S., Graf Pannatier, E., Fonti, P., Frank, D., Ullrich, B., Saurer, M., Siegwolf,  
 947 R., Battipaglia, G., Werner, W., et al. (2014). Seasonal transfer of oxygen isotopes from  
 948 precipitation and soil to the tree ring: source water versus needle water enrichment. *New Phytol.*  
 949 202, 772–783.  
 950 Tuthorn, M., Zech, R., Ruppenthal, M., Oelmann, Y., Kahmen, A., del Valle, H.F., Eglinton, T.,  
 951 Rozanski, K., and Zech, M. (2015). Coupling  $\delta^2\text{H}$  and  $\delta^{18}\text{O}$  biomarker results yields  
 952 information on relative humidity and isotopic composition of precipitation – a climate transect  
 953 validation study. *Biogeosciences* 12, 3913–3924.  
 954 Uemura, R., Barkan, E., Abe, O., and Luz, B. (2010). Triple isotope composition of oxygen in  
 955 atmospheric water vapor. *Geophys. Res. Lett.* 37, L04402.  
 956 Valley, J.W., Kitchen, N., Kohn, M.J., Niendorf, C.R., and Spicuzza, M.J. (1995). UWG-2, a  
 957 garnet standard for oxygen isotope ratios: Strategies for high precision and accuracy with laser  
 958 heating. *Geochim. Cosmochim. Acta* 59, 5223–5231.  
 959 Wahl, E.R., Diaz, H.F., and Ohlwein, C. (2012). A pollen-based reconstruction of summer  
 960 temperature in central North America and implications for circulation patterns during medieval  
 961 times. *Glob. Planet. Change* 84–85, 66–74.  
 962 Webb, E.A., and Longstaffe, F.J. (2000). The oxygen isotopic compositions of silica phytoliths  
 963 and plant water in grasses: Implications for the study of paleoclimate. *Geochim. Cosmochim.*  
 964 *Acta* 64, 767–780.  
 965 Webb, E.A., and Longstaffe, F.J. (2002). Climatic influences on the oxygen isotopic composition  
 966 of biogenic silica in prairie grass. *Geochim. Cosmochim. Acta* 66, 1891–1904.  
 967 Webb, E.A., and Longstaffe, F.J. (2003). The relationship between phytolith- and plant-water  
 968  $\delta^{18}\text{O}$  values in grasses. *Geochim. Cosmochim. Acta* 67, 1437–1449.  
 969 Webb, E.A., and Longstaffe, F.J. (2006). Identifying the  $\delta^{18}\text{O}$  signature of precipitation in grass  
 970 cellulose and phytoliths: Refining the paleoclimate model. *Geochim. Cosmochim. Acta* 70,  
 971 2417–2426.  
 972 Welle, B.J.H. ter (1976). On the occurrence of Silica grains in the secondary xylem of the  
 973 *Chrysobalanaceae*.  
 974 Welp, L.R., Lee, X., Kim, K., Griffis, T.J., Billmark, K.A., and Baker, J.M. (2008).  $\delta^{18}\text{O}$  of  
 975 water vapour, evapotranspiration and the sites of leaf water evaporation in a soybean canopy.  
 976 *Plant Cell Environ.* 31, 1214–1228.  
 977 Wernicke, J., Griebinger, J., Hochreuther, P., and Bräuning, A. (2015). Variability of summer

978 humidity during the past 800 years on the eastern Tibetan Plateau inferred from  $\delta^{18}\text{O}$  of tree-  
979 ring cellulose. *Clim Past* *11*, 327–337.  
980 White, F., Unesco, and Office, U.N.S.-S. (1983). The vegetation of Africa: a descriptive memoir  
981 to accompany the Unesco/AETFAT/UNSO vegetation map of Africa (Unesco).

982 **Table 1.** Growth chamber experiment : experimental set-up, phytolith content and morphological characteristics, isotope enrichments ( $\Delta^{18}\text{O}_{\text{A-B}} = \delta^{\text{a}}_{\text{a}}$   
983  $-\delta^{\text{b}}_{\text{b}}$ ), associated  $^{17}\text{O}$ -excess<sub>e</sub> ( $^{17}\text{O}$ -excess<sub>e</sub> =  $\Delta^{17}\text{O} - 0.528 \times \Delta^{18}\text{O}$ ),  $\theta$  ( $\theta = \Delta^{17}\text{O} / \Delta^{18}\text{O}$ ) and  $\lambda$  values of phytoliths compared to either leaf water or  
984 irrigation water and of leaf water compared to irrigation water. Av : average ; n : number of replicates ; SD : standard deviation calculated on the  
985 replicates; n.v. : no value. Transp. (l/day), Conc. (% d.w.) and LC (%) stands for transpiration expressed in liter/day, phytolith concentration  
986 expressed in % of the dry weight and long cell abundance in the phytolith morphological assemblage expressed in % of counted phytoliths with  
987 taxonomic significance, respectively. Samples are named according to the climate chamber # they were collected in (e.g. P1, P2), the set relative  
988 humidity (e.g. 40, 60) and the date of sampling (e.g. 29-04-16 for dd/mm/yy).

| Experimental set-up |       |     |       |     |                          |             |         |  | Phytoliths (Phyto) |            |    | Leaf water -irrigation water (LW-IW) |                       |                                      |              | Phytolith - leaf water (Phyto-LW) |                       |                                      |               | Phytolith -irrigation water (Phyto-IW) |                       |                                      |               |
|---------------------|-------|-----|-------|-----|--------------------------|-------------|---------|--|--------------------|------------|----|--------------------------------------|-----------------------|--------------------------------------|--------------|-----------------------------------|-----------------------|--------------------------------------|---------------|----------------------------------------|-----------------------|--------------------------------------|---------------|
| Duration            | Temp. | SD  | RH    | SD  | Light                    | Transp.     | Biomass |  | Sample             | Conc.      | LC | $\Delta^{18}\text{O}$                | $\Delta^{17}\text{O}$ | $^{17}\text{O}$ -excess <sub>e</sub> | $\theta$     | $\Delta^{18}\text{O}$             | $\Delta^{17}\text{O}$ | $^{17}\text{O}$ -excess <sub>e</sub> | $\theta$      | $\Delta^{18}\text{O}$                  | $\Delta^{17}\text{O}$ | $^{17}\text{O}$ -excess <sub>e</sub> | $\theta$      |
| day                 | °C    | %   |       |     | mmol/m <sup>2</sup> /sec | l/day       | g       |  |                    | % d.w.     | %  | %                                    |                       | per meg                              |              | %                                 |                       | per meg                              |               | %                                      |                       | per meg                              |               |
| 11                  | 25    | 0.2 | 41.2  | 1   | 278                      |             | 13      |  | P1-40-29-04-16     | n.v.       |    | 16.238                               | 8.420                 | -154                                 | 0.519        | 33.776                            | 17.589                | -244                                 | 0.521         | 50.013                                 | 26.009                | -398                                 | 0.520         |
| 10                  | 25    | 0.2 | 41.3  | 1.1 | 278                      | 0.49        | 21      |  | P10-40-10-05-16    | 0.8        |    | 13.171                               | 6.799                 | -155                                 | 0.516        | 33.530                            | 17.498                | -206                                 | 0.522         | 46.701                                 | 24.297                | -361                                 | 0.520         |
| 11                  | 25    | 0.4 | 41.9  | 1   | 311                      | 0.69        | 37      |  | P1-40-20-05-16     | 0.8        | 21 | 16.345                               | 8.460                 | -170                                 | 0.518        | 29.577                            | 15.401                | -216                                 | 0.521         | 45.922                                 | 23.861                | -385                                 | 0.520         |
| 14                  | 25    | 0.2 | 41.4  | 0.9 | 278                      | 0.65        | 38      |  | P1-40-03-06-16     | 1.8        |    | n.v.                                 | n.v.                  | n.v.                                 | n.v.         | 32.415                            | 16.874                | -241                                 | 0.521         | n.v.                                   | n.v.                  | n.v.                                 | n.v.          |
|                     |       |     |       |     | <b>Av.</b>               | <b>0.61</b> |         |  |                    | <b>1.2</b> |    | <b>15.251</b>                        | <b>7.893</b>          | <b>-159</b>                          | <b>0.517</b> | <b>32.324</b>                     | <b>16.840</b>         | <b>-227</b>                          | <b>0.521</b>  | <b>47.545</b>                          | <b>24.723</b>         | <b>-381</b>                          | <b>0.520</b>  |
|                     |       |     |       |     | <b>SD</b>                | <b>0.11</b> |         |  |                    | <b>0.6</b> |    | <b>1.802</b>                         | <b>0.947</b>          | <b>9</b>                             | <b>0.001</b> | <b>1.925</b>                      | <b>1.011</b>          | <b>19</b>                            | <b>0.0006</b> | <b>2.172</b>                           | <b>1.135</b>          | <b>19</b>                            | <b>0.0003</b> |
| 11                  | 25    | 0.5 | 60.2  | 2.5 | 311                      |             | 21      |  | P10-60-29-04-16    | n.v.       |    | 15.115                               | 7.864                 | -117                                 | 0.520        | 29.133                            | 15.211                | -171                                 | 0.522         | 44.248                                 | 23.075                | -288                                 | 0.521         |
| 11                  | 25    | 0.2 | 60.5  | 1   | 289                      | 0.57        | 33      |  | P2-60-10-05-16     | 0.7        |    | 16.885                               | 8.737                 | -178                                 | 0.517        | 25.877                            | 13.575                | -88                                  | 0.525         | 42.761                                 | 22.312                | -266                                 | 0.522         |
| 10                  | 25    | 0.8 | 60.2  | 4.8 | 311                      | 0.60        | 48      |  | P10-60-20-05-16    | 0.8        | 13 | 12.014                               | 6.242                 | -101                                 | 0.520        | 30.254                            | 15.804                | -170                                 | 0.522         | 42.268                                 | 22.047                | -271                                 | 0.522         |
| 14                  | 25    | 0.6 | 60.3  | 3.2 | 311                      | 0.76        | 60      |  | P10-60-03-06-16    | 1.3        |    | n.v.                                 | n.v.                  | n.v.                                 | n.v.         | 32.915                            | 17.186                | -193                                 | 0.522         | n.v.                                   | n.v.                  | n.v.                                 | n.v.          |
|                     |       |     |       |     | <b>Av.</b>               | <b>0.64</b> |         |  |                    | <b>0.9</b> |    | <b>14.671</b>                        | <b>7.614</b>          | <b>-132</b>                          | <b>0.519</b> | <b>29.545</b>                     | <b>15.444</b>         | <b>-156</b>                          | <b>0.523</b>  | <b>43.093</b>                          | <b>22.478</b>         | <b>-275</b>                          | <b>0.522</b>  |
|                     |       |     |       |     | <b>SD</b>                | <b>0.10</b> |         |  |                    | <b>0.3</b> |    | <b>2.465</b>                         | <b>1.266</b>          | <b>41</b>                            | <b>0.001</b> | <b>2.915</b>                      | <b>1.496</b>          | <b>46</b>                            | <b>0.0012</b> | <b>1.031</b>                           | <b>0.534</b>          | <b>11</b>                            | <b>0.0001</b> |
| 11                  | 25    | 0.2 | 80.2  | 2.8 | 289                      |             | 24      |  | P2-85-29-04-16     | n.v.       |    | 7.826                                | 4.067                 | -65                                  | 0.520        | 28.039                            | 14.668                | -136                                 | 0.523         | 35.865                                 | 18.736                | -201                                 | 0.522         |
| 10                  | 25    | 0.2 | 81.5  | 1.3 | 289                      | 0.28        | 27      |  | P1-85-10-05-16     | 0.4        |    | 7.957                                | 4.139                 | -62                                  | 0.520        | 28.276                            | 14.783                | -147                                 | 0.523         | 36.233                                 | 18.922                | -209                                 | 0.522         |
| 11                  | 25    | 0.2 | 76.6  | 2.5 | 278                      | 0.22        | 27      |  | P2-85-20-05-16     | 0.6        | 10 | 6.679                                | 3.429                 | -97                                  | 0.513        | 28.668                            | 14.993                | -144                                 | 0.523         | 35.347                                 | 18.422                | -241                                 | 0.521         |
| 14                  | 25    | 0.2 | 82.5  | 1.1 | 289                      | 0.36        | 37      |  | P2-85-03-06-16     | 1.0        |    | n.v.                                 | n.v.                  | n.v.                                 | n.v.         | 28.888                            | 15.041                | -212                                 | 0.521         | n.v.                                   | n.v.                  | n.v.                                 | n.v.          |
|                     |       |     |       |     | <b>Av.</b>               | <b>0.29</b> |         |  |                    | <b>0.7</b> |    | <b>7.487</b>                         | <b>3.879</b>          | <b>-75</b>                           | <b>0.518</b> | <b>28.468</b>                     | <b>14.871</b>         | <b>-160</b>                          | <b>0.522</b>  | <b>35.815</b>                          | <b>18.694</b>         | <b>-217</b>                          | <b>0.522</b>  |
|                     |       |     |       |     | <b>SD</b>                | <b>0.07</b> |         |  |                    | <b>0.3</b> |    | <b>0.703</b>                         | <b>0.391</b>          | <b>20</b>                            | <b>0.004</b> | <b>0.382</b>                      | <b>0.176</b>          | <b>35</b>                            | <b>0.0012</b> | <b>0.445</b>                           | <b>0.253</b>          | <b>21</b>                            | <b>0.0007</b> |
| 11                  | 25    |     | 100.0 |     | 307                      | 0.03        | 31      |  | P3-100-10-05-16    | 0.0        |    | 14.681                               | 7.630                 | -122                                 | 0.520        | 21.325                            | 11.170                | -90                                  | 0.524         | 36.006                                 | 18.800                | -212                                 | 0.522         |
| 10                  | 25    |     | 100.0 |     | 307                      | 0.01        |         |  | P3-100-20-05-16    | 0.0        | 5  | 7.706                                | 4.014                 | -54                                  | 0.521        | 27.344                            | 14.284                | -153                                 | 0.522         | 35.050                                 | 18.299                | -208                                 | 0.522         |
| 14                  | 25    |     | 100.0 |     | 307                      | 0.05        | 21      |  | P3-100-03-06-16    | 0.2        |    | n.v.                                 | n.v.                  | n.v.                                 | n.v.         | 35.233                            | 18.403                | -200                                 | 0.522         | n.v.                                   | n.v.                  | n.v.                                 | n.v.          |
|                     |       |     |       |     | <b>Av.</b>               | <b>0.03</b> |         |  |                    | <b>0.1</b> |    | <b>11.194</b>                        | <b>5.822</b>          | <b>-88</b>                           | <b>0.520</b> | <b>27.968</b>                     | <b>14.619</b>         | <b>-148</b>                          | <b>0.523</b>  | <b>35.528</b>                          | <b>18.549</b>         | <b>-210</b>                          | <b>0.522</b>  |
|                     |       |     |       |     | <b>SD</b>                | <b>0.02</b> |         |  |                    | <b>0.1</b> |    | <b>4.932</b>                         | <b>2.557</b>          | <b>48</b>                            | <b>0.001</b> | <b>6.975</b>                      | <b>3.628</b>          | <b>55</b>                            | <b>0.0008</b> | <b>0.676</b>                           | <b>0.354</b>          | <b>3</b>                             | <b>0.0000</b> |
|                     |       |     |       |     |                          |             |         |  | Av.(a)             |            |    | 0.519                                |                       |                                      |              |                                   |                       |                                      |               |                                        |                       |                                      |               |
|                     |       |     |       |     |                          |             |         |  | SD (a)             |            |    | 0.002                                |                       |                                      |              |                                   |                       |                                      |               |                                        |                       |                                      |               |
|                     |       |     |       |     |                          |             |         |  |                    |            |    | $\lambda=0.518$                      |                       |                                      |              |                                   |                       |                                      |               | $\lambda=0.515$                        |                       |                                      |               |

990 **Table 2.** Natural West and Central African phytolith samples: coordinates, climatic parameters,  
991 calculated phytolith index d/p, measured  $\delta^{18}\text{O}_{\text{Phyto}}$ ,  $\delta^{17}\text{O}_{\text{Phyto}}$ ,  $^{17}\text{O}$ -excess<sub>Phyto</sub>, calculated  $\delta^{18}\text{O}$   
992 of phytolith forming water ( $\delta^{18}\text{O}_{\text{PhytoFW}}$ ) and precipitation-weighted  $\delta^{18}\text{O}_{\text{Pre-rd0>1}}$ . Average and  
993 standard deviation (SD) are given for replicates. MAP: Mean Annual Precipitation; MAT:  
994 Mean Annual Temperature; RH: mean annual relative humidity; RH15: RH at 15:00 H UTC;  
995 RH-rd0>1: relative humidity average for months with at least one day with precipitation higher  
996 than 0.1mm; RH15-rd0>1: RHrd0>1 at 15:00 H UTC. See text for data source and calculation.  
997

| Identifier      | Lat  | long  | MAP    | MAT  | RH   | RH-rd0>1 | RH15 | RH15-rd0>1 | δ <sup>18</sup> O <sub>Phyto</sub> (‰) | d/p  | n | δ <sup>18</sup> O <sub>Phyto</sub> SD | δ <sup>17</sup> O <sub>Phyto</sub> SD | <sup>17</sup> O-excess <sub>Phyto</sub> | SD | δ <sup>18</sup> O <sub>Phyto FW</sub> | Δ <sup>18</sup> O <sub>Phyto FW-rd0&gt;1</sub> |
|-----------------|------|-------|--------|------|------|----------|------|------------|----------------------------------------|------|---|---------------------------------------|---------------------------------------|-----------------------------------------|----|---------------------------------------|------------------------------------------------|
|                 |      |       | mm     | °C   | %    | %        | %    | %          | ‰                                      |      |   | ‰                                     | ‰                                     | per meg                                 |    | ‰                                     |                                                |
| Savana          |      |       |        |      |      |          |      |            |                                        |      |   |                                       |                                       |                                         |    |                                       |                                                |
| RIM 3           | 21.5 | -13.0 | 52.4   | 27.3 | 47.1 | 61.7     | 35.4 | 47.0       | -3.220                                 | 0.03 |   | 33.127                                | 17.218                                | -243                                    |    | 2.384                                 | 36.351                                         |
| RIM 8           | 21.0 | -12.2 | 49.1   | 28.2 | 44.1 | 60.5     | 33.0 | 45.9       | -3.420                                 | 0.04 |   | 34.813                                | 18.304                                | -243                                    |    | 4.221                                 | 38.239                                         |
| MAU06           | 20.6 | -12.6 | 68.8   | 27.6 | 44.0 | 58.0     | 33.0 | 44.1       | -3.829                                 | 0.04 |   | 28.871                                | 15.088                                | -268                                    |    | -1.816                                | 32.707                                         |
| RIM 11          | 16.9 | -15.2 | 209.1  | 27.3 | 45.9 | 68.5     | 32.5 | 52.2       | -4.047                                 | 0.04 |   | 37.506                                | 19.785                                | -211                                    |    | 6.745                                 | 41.561                                         |
| RIM 10          | 16.7 | -15.2 | 227.6  | 27.2 | 45.7 | 68.7     | 32.1 | 52.1       | -4.042                                 | 0.01 |   | 38.163                                | 20.094                                | -256                                    |    | 7.377                                 | 42.214                                         |
| S33             | 16.4 | -14.8 | 270.5  | 27.7 | 42.7 | 57.6     | 29.7 | 41.8       | -3.861                                 | 0.04 |   | 35.961                                | 18.939                                | -225                                    |    | 5.276                                 | 39.829                                         |
| S32             | 16.3 | -15.4 | 284.4  | 27.3 | 46.9 | 61.6     | 33.5 | 46.2       | -3.768                                 | 0.04 |   | 37.297                                | 19.617                                | -266                                    |    | 6.537                                 | 41.072                                         |
| C4L1            | 16.1 | -14.0 | 287.7  | 29.8 | 40.9 | 57.1     | 29.4 | 42.9       | -3.874                                 | 0.02 | 2 | 34.915                                | 0.368                                 | -262                                    | 11 | 4.609                                 | 38.797                                         |
| S40             | 16.1 | -13.9 | 329.1  | 29.2 | 40.6 | 56.8     | 29.4 | 43.0       | -3.969                                 | 0.06 |   | 35.385                                | 18.592                                | -262                                    |    | 4.967                                 | 39.363                                         |
| S29             | 16.1 | -14.9 | 313.0  | 27.8 | 43.6 | 59.1     | 30.8 | 43.7       | -3.833                                 | 0.05 | 2 | 35.449                                | 0.583                                 | -236                                    | 0  | 4.785                                 | 39.290                                         |
| 82-46           | 16.0 | -16.0 | 316.4  | 27.1 | 53.0 | 67.5     | 40.1 | 54.2       | -3.604                                 | 0.03 |   | 33.575                                | 17.654                                | -228                                    |    | 2.800                                 | 37.185                                         |
| 82-47           | 16.0 | -16.0 | 316.4  | 27.1 | 53.0 | 67.5     | 40.1 | 54.2       | -3.604                                 | 0.04 |   | 36.429                                | 19.169                                | -247                                    |    | 5.642                                 | 40.039                                         |
| S44             | 15.8 | -13.5 | 369.1  | 29.6 | 40.2 | 57.2     | 29.6 | 44.1       | -4.073                                 | 0.04 | 2 | 36.211                                | 0.593                                 | -258                                    | 24 | 5.863                                 | 40.292                                         |
| C4L3            | 15.4 | -13.7 | 467.7  | 29.6 | 41.2 | 59.1     | 30.3 | 45.7       | -4.023                                 | 0.05 | 2 | 33.688                                | 0.312                                 | -290                                    | 13 | 3.345                                 | 37.719                                         |
| S54             | 15.3 | -13.0 | 443.6  | 29.7 | 41.3 | 60.0     | 31.0 | 47.2       | -4.009                                 | 0.04 |   | 35.586                                | 18.680                                | -282                                    |    | 5.261                                 | 39.603                                         |
| S58             | 15.1 | -12.8 | 478.6  | 29.7 | 42.0 | 56.3     | 31.7 | 44.3       | -4.009                                 | 0.05 | 2 | 36.161                                | 0.234                                 | -266                                    | 21 | 5.833                                 | 40.179                                         |
| C5L1            | 15.0 | -12.9 | 583.2  | 29.7 | 42.5 | 57.2     | 32.1 | 44.9       | -3.972                                 | 0.06 | 3 | 29.525                                | 0.483                                 | -208                                    | 7  | -0.787                                | 33.505                                         |
| 83-62           | 14.9 | -12.3 | 515.8  | 29.7 | 42.9 | 58.1     | 32.6 | 46.0       | -4.097                                 | 0.06 | 2 | 36.320                                | 0.747                                 | -262                                    | 36 | 5.987                                 | 40.426                                         |
| S5              | 14.7 | -16.2 | 511.1  | 28.1 | 53.3 | 68.6     | 39.2 | 53.9       | -3.789                                 | 0.08 | 2 | 24.297                                | 0.115                                 | -205                                    | 4  | -6.312                                | 28.094                                         |
| 82-79           | 14.2 | -16.1 | 669.0  | 28.3 | 54.2 | 70.1     | 39.9 | 55.2       | -3.774                                 | 0.03 | 2 | 33.913                                | 0.046                                 | -229                                    |    | 3.356                                 | 37.694                                         |
| 83-75           | 14.1 | -12.7 | 736.2  | 29.1 | 46.7 | 63.1     | 35.6 | 50.3       | -3.936                                 | 0.03 |   | 32.418                                | 16.969                                | -290                                    |    | 2.000                                 | 36.362                                         |
| 82-78           | 14.1 | -16.1 | 669.0  | 28.3 | 55.2 | 71.0     | 40.8 | 56.2       | -3.768                                 | 0.18 |   | 23.789                                | 12.437                                | -201                                    |    | -6.785                                | 27.565                                         |
| S84             | 13.9 | -13.4 | 775.2  | 28.9 | 47.4 | 64.1     | 36.1 | 50.9       | -4.040                                 | 0.03 | 2 | 32.600                                | 0.435                                 | -277                                    | 5  | 2.141                                 | 36.648                                         |
| S118            | 13.6 | -13.7 | 878.1  | 28.6 | 49.6 | 66.3     | 37.7 | 52.9       | -4.008                                 | 0.02 |   | 30.007                                | 15.779                                | -188                                    |    | -0.501                                | 34.023                                         |
| S88             | 13.6 | -13.6 | 880.0  | 28.6 | 49.4 | 66.2     | 37.7 | 52.9       | -3.996                                 | 0.02 |   | 28.371                                | 14.900                                | -189                                    |    | -2.129                                | 32.375                                         |
| 83-120          | 13.5 | -13.8 | 934.5  | 28.5 | 50.7 | 67.3     | 38.7 | 53.8       | -3.984                                 | 0.05 |   | 31.622                                | 16.570                                | -262                                    |    | 1.101                                 | 35.614                                         |
| 83-122          | 13.4 | -14.9 | 947.3  | 28.1 | 53.6 | 68.1     | 39.8 | 53.7       | -3.928                                 | 0.03 | 2 | 31.240                                | 0.628                                 | -231                                    | 9  | 0.649                                 | 35.176                                         |
| S122            | 13.3 | -13.9 | 934.5  | 28.5 | 52.1 | 68.1     | 39.7 | 53.7       | -3.971                                 | 0.03 |   | 34.379                                | 18.095                                | -219                                    |    | 3.851                                 | 38.350                                         |
| S93             | 13.3 | -13.2 | 1005.3 | 28.6 | 51.6 | 68.2     | 39.7 | 55.1       | -3.925                                 | 0.08 |   | 30.064                                | 15.787                                | -211                                    |    | -0.435                                | 33.989                                         |
| 83-98           | 13.1 | -12.8 | 1067.0 | 28.7 | 52.7 | 69.3     | 40.8 | 56.3       | -4.060                                 | 0.04 |   | 29.692                                | 15.621                                | -177                                    |    | -0.800                                | 33.753                                         |
| S128            | 13.0 | -14.1 | 1055.1 | 28.2 | 54.7 | 70.2     | 41.7 | 56.5       | -3.765                                 | 0.07 | 2 | 34.078                                | 0.567                                 | -233                                    | 29 | 3.500                                 | 37.843                                         |
| S.130           | 12.9 | -14.2 | 1113.9 | 28.0 | 55.1 | 70.3     | 41.8 | 56.4       | -3.961                                 | 0.03 | 3 | 35.909                                | 0.515                                 | -268                                    | 19 | 5.286                                 | 39.870                                         |
| 83-103          | 12.9 | -12.4 | 1114.0 | 28.5 | 53.7 | 70.4     | 41.8 | 57.5       | -4.329                                 | 0.03 |   | 30.499                                | 15.855                                | -249                                    |    | -0.024                                | 34.828                                         |
| S.138           | 12.9 | -14.9 | 1127.1 | 27.7 | 56.8 | 70.9     | 42.4 | 56.6       | -4.069                                 | 0.03 | 2 | 35.822                                | 0.5                                   | -247                                    | 5  | 5.138                                 | 39.891                                         |
| S136            | 12.8 | -14.7 | 1113.4 | 27.8 | 57.4 | 71.5     | 43.3 | 57.4       | -4.023                                 | 0.02 |   | 33.422                                | 17.355                                | -246                                    |    | 2.767                                 | 37.445                                         |
| 83-116          | 12.7 | -12.2 | 1233.2 | 28.5 | 54.8 | 71.4     | 42.7 | 58.5       | -4.316                                 | 0.03 | 2 | 31.084                                | 16.149                                | -264                                    |    | 0.558                                 | 35.401                                         |
| 83-115          | 12.4 | -12.3 | 1301.3 | 27.8 | 56.5 | 66.8     | 44.2 | 53.8       | -4.170                                 | 0.01 | 2 | 31.524                                | 0.4                                   | -226                                    | 17 | 0.887                                 | 35.694                                         |
| Wooded savana   |      |       |        |      |      |          |      |            |                                        |      |   |                                       |                                       |                                         |    |                                       |                                                |
| 83-8            | 14.9 | -15.9 | 485.2  | 28.0 | 50.9 | 67.0     | 37.3 | 52.4       | -3.948                                 | 0.16 |   | 36.813                                | 19.167                                | -270                                    |    | 6.181                                 | 40.762                                         |
| S7              | 14.8 | -16.0 | 513.6  | 28.2 | 52.0 | 67.9     | 38.0 | 53.1       | -4.263                                 | 0.26 |   | 29.491                                | 15.331                                | -241                                    |    | -1.076                                | 33.755                                         |
| 83-4            | 14.7 | -16.5 | 539.7  | 27.0 | 57.4 | 70.9     | 43.7 | 57.3       | -3.821                                 | 0.43 |   | 26.127                                | 13.565                                | -231                                    |    | -4.665                                | 29.948                                         |
| 82-77           | 14.6 | -16.3 | 535.5  | 28.0 | 53.5 | 69.0     | 39.2 | 54.0       | -3.798                                 | 0.14 | 2 | 35.214                                | 0.8                                   | -281                                    | 10 | 4.601                                 | 39.012                                         |
| S91             | 13.6 | -13.4 | 883.1  | 28.7 | 49.4 | 66.2     | 37.8 | 53.0       | -3.984                                 | 0.40 | 2 | 34.512                                | 0.2                                   | -213                                    | 30 | 4.013                                 | 38.496                                         |
| C4L8            | 13.5 | -13.7 | 878.1  | 28.6 | 50.7 | 67.3     | 38.7 | 53.8       | -3.984                                 | 0.13 |   | 32.302                                | 16.850                                | -206                                    |    | 1.793                                 | 36.286                                         |
| 83-127          | 13.1 | -14.1 | 1055.1 | 28.2 | 53.6 | 69.3     | 40.7 | 55.5       | -3.785                                 | 0.49 | 2 | 35.638                                | 0.2                                   | -244                                    | 1  | 5.054                                 | 39.423                                         |
| Enclosed savana |      |       |        |      |      |          |      |            |                                        |      |   |                                       |                                       |                                         |    |                                       |                                                |
| Biendi 1 -2.0   | 11.1 |       | 1839.0 | 25.9 | 80.9 | 80.9     | 67.4 | 67.4       | -3.687                                 | 0.76 |   | 33.086                                | 0.0                                   | -205                                    | 20 | 2.096                                 | 36.773                                         |
| Doubou 1 -1.8   | 10.9 |       | 1986.0 | 25.9 | 81.2 | 81.2     | 67.9 | 67.9       | -3.631                                 | 1.58 |   | 31.931                                | 0.6                                   | -194                                    | 8  | 0.954                                 | 35.562                                         |
| Humid forest    |      |       |        |      |      |          |      |            |                                        |      |   |                                       |                                       |                                         |    |                                       |                                                |
| 83-151          | 12.5 | -16.6 | 1428.6 | 26.5 | 65.8 | 74.9     | 51.0 | 60.8       | -3.787                                 | 6.78 |   | 33.097                                | 17.288                                | -187                                    |    | 2.221                                 | 36.884                                         |
| S155            | 12.5 | -16.3 | 1352.6 | 27.0 | 64.4 | 74.3     | 49.4 | 59.9       | -3.777                                 | 4.85 | 2 | 29.092                                | 0.2                                   | -181                                    | 4  | -1.698                                | 32.869                                         |
| 04-94           |      | 13.1  | 1676.4 | 24.3 | 81.4 | 81.4     | 65.8 | 65.8       | -4.464                                 | 2.44 | 2 | 32.638                                | 0.2                                   | -140                                    | 4  | 1.371                                 | 37.102                                         |
| 04-88           |      | 12.4  | 1707.0 | 24.9 | 81.9 | 81.9     | 67.1 | 67.1       | -4.458                                 | 5.45 |   | 33.137                                | 0.4                                   | -151                                    | 18 | 1.977                                 | 37.595                                         |
| 04-47           | -0.2 | 12.3  | 1724.0 | 26.2 | 82.1 | 82.1     | 67.4 | 67.4       | -1.515                                 | 3.48 |   | 32.953                                | 0.0                                   | -185                                    | 17 | 2.026                                 | 34.468                                         |
| 04-66           | -0.2 | 12.5  | 1690.6 | 25.8 | 82.0 | 82.0     | 67.3 | 67.3       | -4.354                                 | 1.84 |   | 29.959                                | 0.6                                   | -177                                    | 24 | -1.040                                | 34.314                                         |
| 04-65           | -0.2 | 12.6  | 1690.6 | 25.8 | 82.0 | 82.0     | 67.3 | 67.3       | -4.195                                 | 2.19 |   | 32.791                                | 0.6                                   | -156                                    | 25 | 1.791                                 | 36.985                                         |
| 04-118          | -0.2 | 10.5  | 2148.4 | 26.4 | 82.5 | 82.5     | 69.2 | 69.2       | -3.556                                 | 3.69 |   | 31.840                                | 0.4                                   | -164                                    | 4  | 0.945                                 | 35.396                                         |
| Dimoniki -4.1   | 12.4 |       | 1286.6 | 24.7 | 80.3 | 80.3     | 68.1 | 68.1       | -4.284                                 | 5.80 |   | 30.928                                | 16.123                                | -205                                    |    | -0.275                                | 35.212                                         |
| Outliers        |      |       |        |      |      |          |      |            |                                        |      |   |                                       |                                       |                                         |    |                                       |                                                |
| RIM1            | 16.7 | -16.0 | 216.4  | 26.7 | 52.3 | 72.2     | 39.4 | 58.6       | -3.857                                 | 0.06 |   | 38.131                                | 19.828                                | -305                                    |    | 7.264                                 | 41.987                                         |
| C3L4            | 15.6 | -14.2 | 362.0  | 29.3 | 41.8 | 59.1     | 30.3 | 45.0       | -3.968                                 | 0.06 |   | 25.185                                | 0.2                                   | -157                                    | 10 | -5.211                                | 29.153                                         |

(1) Amount weighted average for months with at least one day with precipitation>0.1mm

## Figure captions

**Figure 1.** Growth chamber experiment: a)  $^{17}\text{O}$ -excess vs relative humidity (RH) of irrigation water (IW), soil water (SW), leaf water (LW) and phytolith (Phyto). Error bars show standard deviation (SD) on the replicates. They are smaller than the symbol when not shown. b)  $^{18}\text{O}$ -enrichment from irrigation water to leaf water ( $\Delta^{18}\text{O}_{\text{LW-IW}}$ ), from irrigation water to phytolith ( $\Delta^{18}\text{O}_{\text{Phyto-IW}}$ ) and from leaf water to phytolith ( $\Delta^{18}\text{O}_{\text{Phyto-LW}}$ ). c)  $^{17}\text{O}$ -excess associated with the enrichment from irrigation water to leaf water ( $^{17}\text{O}\text{-excess}_{\text{e LW-IW}}$ ), from irrigation water to phytolith ( $^{17}\text{O}\text{-excess}_{\text{e Phyto-IW}}$ ), and from leaf water to phytolith ( $^{17}\text{O}\text{-excess}_{\text{e Phyto-LW}}$ ). d, e and f) linear correlations for the 40-80% RH range extracted from a, b and c, respectively.

**Figure 2.** Growth chamber experiment: phytolith types extracted from *Festuca arundinaceae* and observed in natural light microscopy: epidermal long cell (LC), epidermal short cell (SC).

**Figure 3.** Natural West and Central African transect:  $\delta^{18}\text{O}$  of phytoliths ( $\delta^{18}\text{O}_{\text{Phyto}}$ ) vs relative humidity RH-rd0>1 (see fig. 4 for explanation). Error bars show standard deviation (SD) on the replicates. When not shown, they are smaller than the symbol.

**Figure 4.** Natural West and Central African transect:  $^{17}\text{O}$ -excess vs relative humidity (RH) of phytolith assemblages from soil tops collected under savanna, wooded savanna, humid forest and enclosed savanna along a humidity gradient (Table 1). The growth chamber  $^{17}\text{O}\text{-excess}_{\text{Phyto}}$  vs RH correlation line is displayed for comparison. a) RH-Av: yearly average of monthly means; b) RH-rd0>1: yearly average of monthly means for months with at least one day with precipitation higher than 0.1mm; c) RH15: RH at 15:00 H UTC; d) RH15-rd0>1: RH-rd0>1 at 15:00 H UTC.

**Figure 5.** Natural West and Central African transect:  $^{17}\text{O}$ -excess of phytoliths ( $^{17}\text{O}\text{-excess}_{\text{Phyto}}$ ) vs d/p.

**Figure 6.** Growth chamber experiment:  $^{17}\text{O}$ -excess vs  $\delta^{18}\text{O}$  of irrigation water (IW), soil water (SW), bulk leaf water (LW) and phytolith (Phyto). Error bars show standard deviation (SD) on the replicates. The leaf water line (blue) represents how the triple oxygen isotope composition of the bulk leaf water of *Festuca arundinacea* evolves from an irrigation water signature to a more evaporated water signature when RH decreases. This evolution follows a slope equivalent to  $\theta=0.518$  in a  $\Delta^{17}\text{O}$  vs  $\Delta^{18}\text{O}$  space (table 1). Assuming that phytoliths precipitate from the bulk leaf water, the expected phytolith line (black) should be parallel to the leaf water line as the equilibrium fractionation between phytolith and leaf water is constant at constant temperature (25°C). In the investigated case this fractionation, represented by the black dotted line, is equivalent to  $\theta=0.522$  (table 1). The isotope signature of phytoliths formed at RH higher than 40% follow the expected phytolith line. However, the isotope signature of phytoliths formed at 40% RH suggest a forming water more evaporated than the bulk leaf water.

1036  
1037

Figure 1

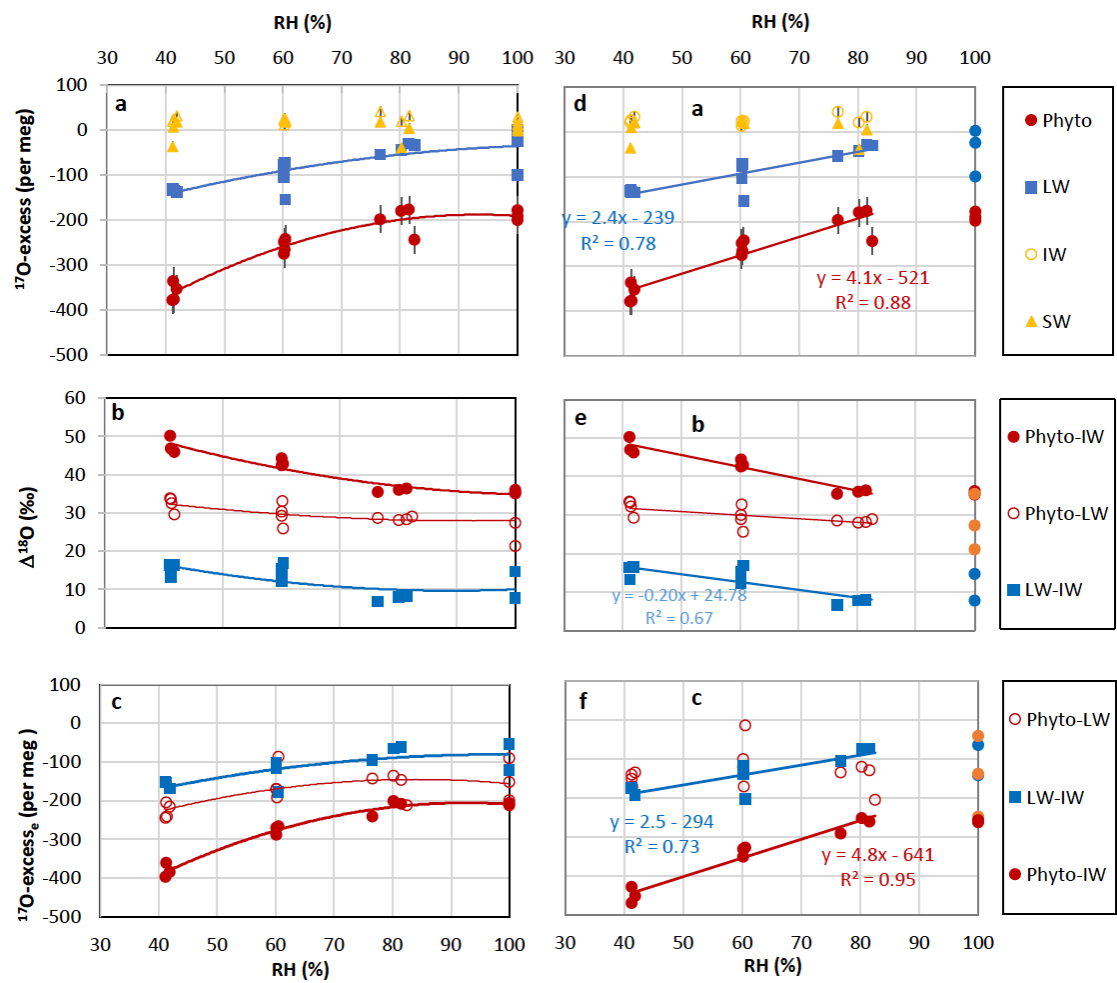

1038  
1039

1040

**Figure 2**

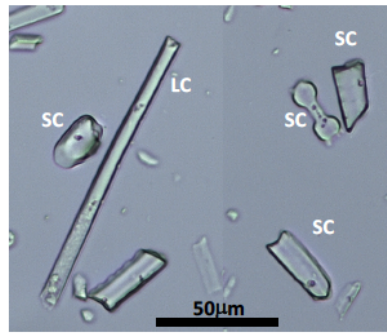

1041

1042  
1043

Figure 3

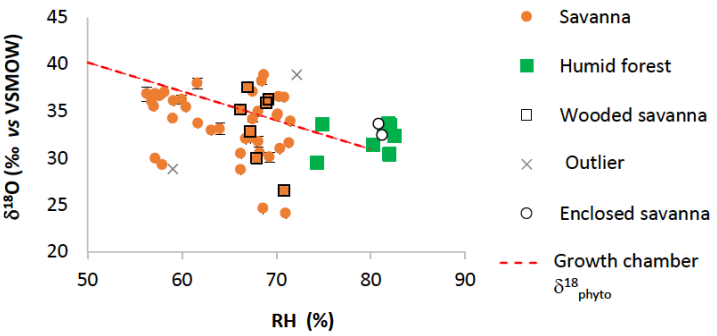

1044



1045  
1046

Figure 4

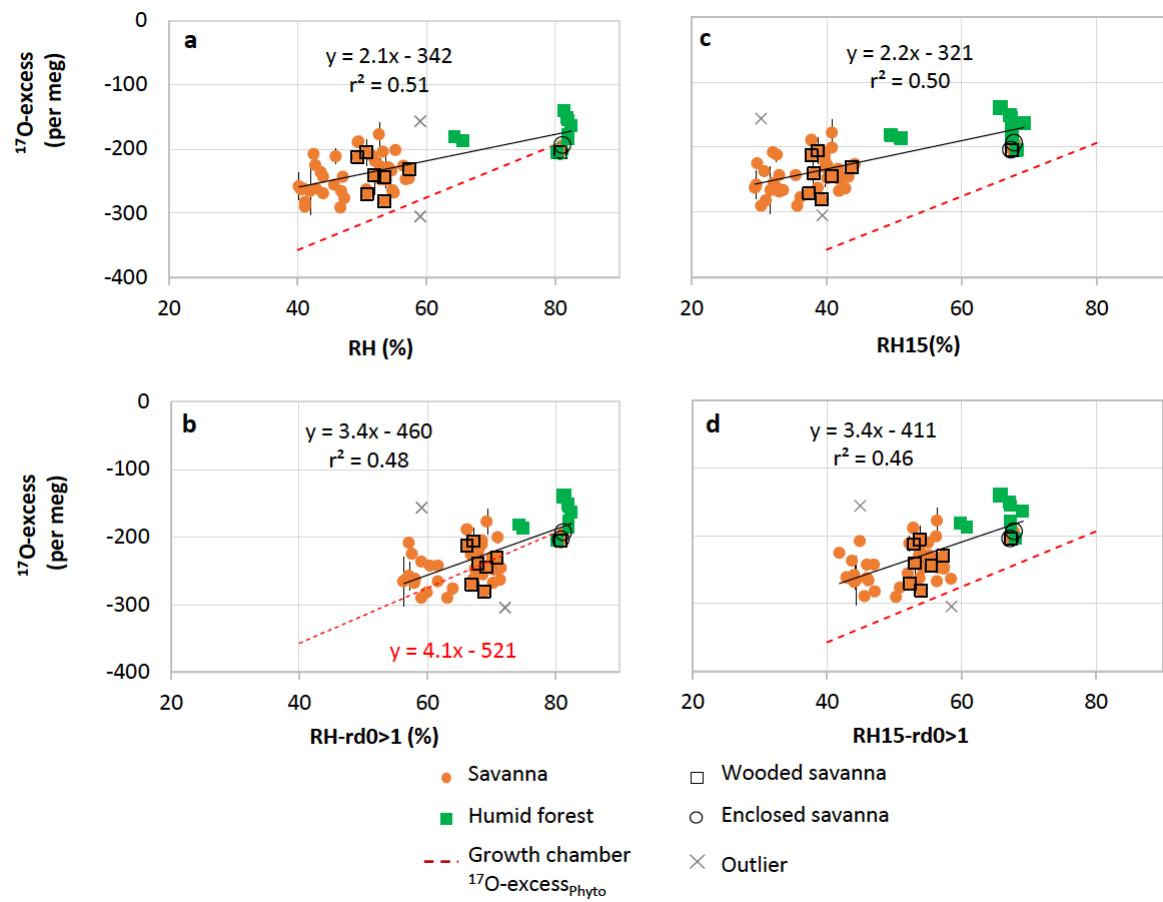

1047

1048  
1049

Figure 5

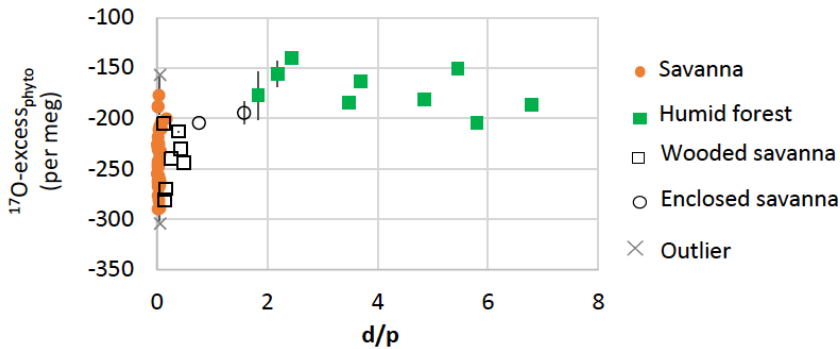

1051  
1052

Figure 6

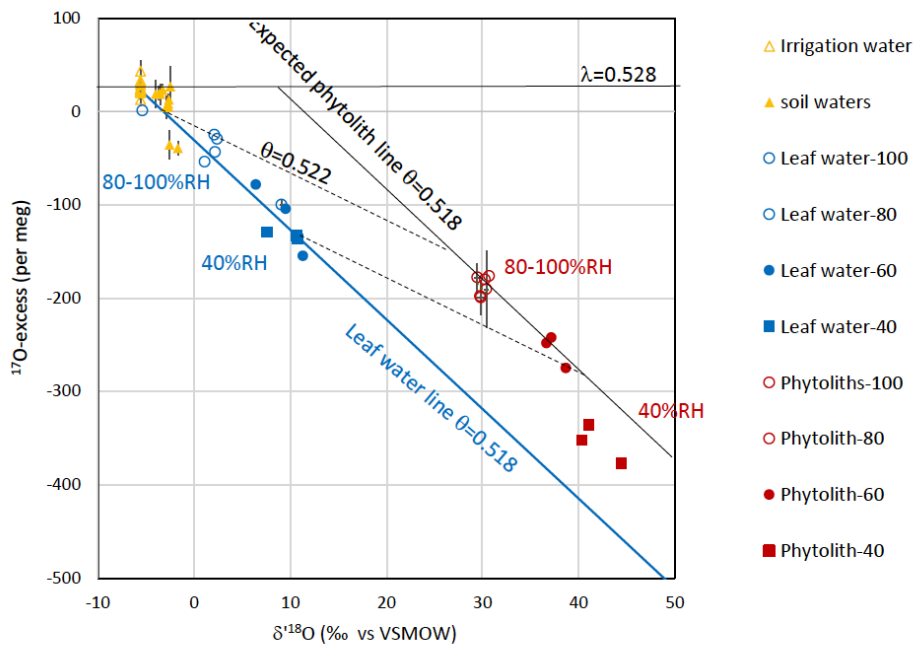

1053  
1054  
1055

1056 **Table S1: a)** Measurement of the water laboratory standards with the laser analyzer Picarro L2140i and the isotope ratio mass-spectrometer MAT  
 1057 253; **b)** Measurements of soil water samples with the isotope laser analyzer (Picarro L2140i) operated in  $^{17}\text{O}$ -excess mode with and without  
 1058 the Picarro micro combustion module (MCM); SD : standard deviation calculated on the replicates.

1059 a)

|           | Laser analyzer<br>Picarro L2140i (Ecotron) |                       |                         | IRMS<br>MAT 253 (LSCE) |                       |                         | Difference laser analyzer/IRMS |                       |                         |
|-----------|--------------------------------------------|-----------------------|-------------------------|------------------------|-----------------------|-------------------------|--------------------------------|-----------------------|-------------------------|
|           | $\delta^{18}\text{O}$                      | $\delta^{17}\text{O}$ | $^{17}\text{O}$ -excess | $\delta^{18}\text{O}$  | $\delta^{17}\text{O}$ | $^{17}\text{O}$ -excess | $\delta^{18}\text{O}$          | $\delta^{17}\text{O}$ | $^{17}\text{O}$ -excess |
|           | ‰                                          | ‰                     | per meg                 | ‰                      | ‰                     | per meg                 | ‰                              | ‰                     | per meg                 |
| GIENS-1   | -0.13                                      | -0.07                 | 1.11                    | -0.26                  | -0.14                 | -5.30                   | 0.13                           | 0.08                  | 6.40                    |
| ECO-1     | -5.68                                      | -2.97                 | 29.13                   | -5.61                  | -2.94                 | 28.10                   | -0.07                          | -0.03                 | 1.04                    |
| ICEBERG-1 | -26.88                                     | -14.25                | 36.09                   | -27.13                 | -14.38                | 35.43                   | 0.24                           | 0.13                  | 0.66                    |

1060

1061 b)

| WITHOUT MCM (3replicates) |                       |       |        |       | WITH MCM (3 replicates) |       |         |       |                       |       |        |       |                         |      |         |      |
|---------------------------|-----------------------|-------|--------|-------|-------------------------|-------|---------|-------|-----------------------|-------|--------|-------|-------------------------|------|---------|------|
| Sample                    | $\delta^{18}\text{O}$ |       |        |       | $\delta^2\text{H}$      |       |         |       | $\delta^{17}\text{O}$ |       |        |       | $^{17}\text{O}$ -excess |      |         |      |
|                           | SD                    |       | SD     |       | SD                      |       | SD      |       | SD                    |       | SD     |       | SD                      |      | SD      |      |
|                           | ‰                     |       | ‰      |       | ‰                       |       | ‰       |       | ‰                     |       | ‰      |       | per meg                 |      | per meg |      |
| B3-100-10-05-16           | -2.643                | 0.029 | -2.607 | 0.010 | -18.704                 | 0.187 | -18.580 | 0.019 | -1.392                | 0.014 | -1.365 | 0.009 | 4.1                     | 3.4  | 12.7    | 5.8  |
| B2-60-10-05-16            | -3.495                | 0.014 | -3.469 | 0.023 | -23.750                 | 0.082 | -23.541 | 0.073 | -1.835                | 0.010 | -1.814 | 0.019 | 12.0                    | 6.4  | 18.7    | 11.1 |
| B3-100-03-06-16           | -2.799                | 0.018 | -2.766 | 0.022 | -18.868                 | 0.105 | -18.894 | 0.185 | -1.462                | 0.022 | -1.457 | 0.019 | 16.7                    | 12.7 | 4.8     | 7.4  |
| M1-40-03-06-16            | -5.605                | 0.020 | -5.584 | 0.005 | -31.737                 | 0.077 | -31.684 | 0.155 | -2.938                | 0.012 | -2.929 | 0.004 | 25.7                    | 3.0  | 23.5    | 1.7  |
| B1-85-10-05-16            | -2.945                | 0.038 | -2.901 | 0.010 | -20.987                 | 0.018 | -20.925 | 0.050 | -1.551                | 0.045 | -1.528 | 0.008 | 4.7                     | 25.4 | 4.8     | 12.1 |
| B10-40-10-05-16           | -2.726                | 0.029 | -2.697 | 0.022 | -19.891                 | 0.071 | -19.594 | 0.097 | -1.434                | 0.030 | -1.416 | 0.015 | 6.8                     | 16.2 | 8.5     | 10.3 |
| B1-40-03-06-16            | -3.903                | 0.011 | -3.895 | 0.005 | -25.017                 | 0.187 | -24.959 | 0.025 | -2.041                | 0.012 | -2.040 | 0.009 | 21.6                    | 6.4  | 18.9    | 10.7 |
|                           | 0.023                 |       | 0.014  |       | 0.104                   |       | 0.086   |       | 0.021                 |       | 0.012  |       | 10.5                    |      |         | 8.4  |

1062

1063  
1064

**Table S2.** Growth chamber experiment : measured  $\delta^{18}\text{O}$ ,  $\delta^{17}\text{O}$  and  $^{17}\text{O}$ -excess of irrigation water (IW), soil water, leaf water (LW) and phytoliths. Av : average ; n : number of replicates ; SD : standard deviation calculated on the replicates; n.v. : no value.

|                 | Irrigation water      |        |        |                       |   |        |                                 | Soil water            |       |        |                       |    |        |                                 | Leaf water            |         |        |                       |   |        |                                 | Phytoliths            |       |         |                       |    |        |                                 |    |
|-----------------|-----------------------|--------|--------|-----------------------|---|--------|---------------------------------|-----------------------|-------|--------|-----------------------|----|--------|---------------------------------|-----------------------|---------|--------|-----------------------|---|--------|---------------------------------|-----------------------|-------|---------|-----------------------|----|--------|---------------------------------|----|
|                 | $\delta^{18}\text{O}$ |        |        | $\delta^{17}\text{O}$ |   |        | $^{17}\text{O}_{\text{excess}}$ | $\delta^{18}\text{O}$ |       |        | $\delta^{17}\text{O}$ |    |        | $^{17}\text{O}_{\text{excess}}$ | $\delta^{18}\text{O}$ |         |        | $\delta^{17}\text{O}$ |   |        | $^{17}\text{O}_{\text{excess}}$ | $\delta^{18}\text{O}$ |       |         | $\delta^{17}\text{O}$ |    |        | $^{17}\text{O}_{\text{excess}}$ |    |
| Sample          | ‰                     | SD     | ‰      | SD                    | n | ‰      |                                 | per meg               | ‰     | SD     | ‰                     | SD | n      |                                 | ‰                     | per meg | ‰      | SD                    | ‰ | SD     |                                 | n                     | ‰     | per meg | ‰                     | SD | ‰      |                                 | SD |
|                 | ‰                     |        | ‰      |                       |   | ‰      | per meg                         | ‰                     |       | ‰      |                       |    | ‰      | per meg                         | ‰                     |         | ‰      |                       |   | ‰      | per meg                         | ‰                     |       | ‰       |                       |    | ‰      | per meg                         |    |
| P1-40-29-04-16  | -5.546                | 0.017  | -2.912 | 0.013                 | 3 | -5.562 | 20                              | -2.562                | 0.026 | -1.389 | 0.029                 | 3  | -2.565 | 36                              | 10.733                | 0.106   | 5.519  | 0.082                 | 2 | 10.676 | -133                            | 45.454                | 0.212 | 23.361  | 0.152                 | 2  | 44.451 | -378                            | 41 |
| P10-40-10-05-16 | -5.594                | 18.139 | -2.933 | 16.016                | 3 | -5.610 | 25                              | -2.697                | 0.022 | -1.416 | 0.015                 | 3  | -2.701 | 9                               | 7.590                 |         | 3.870  |                       | 1 | 7.561  | -130                            | 41.947                | 0.348 | 21.590  | 0.199                 | 2  | 41.091 | -336                            | 15 |
| P1-40-20-05-16  | -5.580                | 0.019  | -2.917 | 0.019                 | 3 | -5.596 | 33                              | -3.658                | 0.013 | -1.913 | 0.013                 | 3  | -3.665 | 20                              | 10.807                |         | 5.554  |                       | 1 | 10.749 | -137                            | 41.150                | 0.592 | 21.161  | 0.291                 | 2  | 40.326 | -352                            | 18 |
| P1-40-03-06-16  | n.v.                  |        | n.v.   |                       |   | n.v.   | n.v.                            | n.v.                  |       | n.v.   |                       |    | n.v.   | n.v.                            | 8.530                 |         | 4.360  |                       | 1 | 8.494  | -135                            | 41.758                |       | 21.451  |                       | 1  | 40.909 | -376                            |    |
| Av.             |                       |        |        |                       |   | -5.589 | 26                              |                       |       |        |                       |    | -2.977 | 21                              |                       |         |        |                       |   | 9.370  | -134                            |                       |       |         |                       |    | 41.694 | -360                            |    |
| SD              |                       |        |        |                       |   | 0.025  | 6                               |                       |       |        |                       |    | 0.600  | 14                              |                       |         |        |                       |   | 1.596  | 3                               |                       |       |         |                       |    | 1.867  | 20                              |    |
| P10-60-29-04-16 | -5.564                | 0.007  | -2.929 | 0.008                 | 3 | -5.579 | 13                              | -2.504                | 0.067 | -1.296 | 0.057                 | 3  | -2.507 | 27                              | 9.581                 | 0.015   | 4.942  | 0.008                 | 2 | 9.535  | -104                            | 39.426                | 0.528 | 20.346  | 0.255                 | 4  | 38.669 | -275                            | 23 |
| P2-60-10-05-16  | -5.563                | 0.001  | -2.917 | 0.016                 | 3 | -5.579 | 24                              | -3.469                | 0.023 | -1.814 | 0.019                 | 3  | -3.475 | 19                              | 11.370                |         | 5.832  |                       | 1 | 11.306 | -154                            | 37.883                | 0.340 | 19.579  | 0.184                 | 4  | 37.183 | -243                            | 4  |
| P10-60-20-05-16 | -5.566                | 0.021  | -2.920 | 0.027                 | 3 | -5.582 | 23                              | -3.260                | 0.028 | -1.699 | 0.008                 | 3  | -3.266 | 23                              | 6.453                 |         | 3.323  |                       | 1 | 6.432  | -78                             | 37.368                | 0.504 | 19.306  | 0.257                 | 2  | 36.687 | -249                            | 4  |
| P10-60-03-06-16 | n.v.                  |        | n.v.   |                       |   | n.v.   | n.v.                            | n.v.                  |       | n.v.   |                       |    | n.v.   | n.v.                            | 2.488                 |         | 1.241  |                       | 1 | 2.485  | -72                             | 36.034                |       | 18.597  |                       | 1  | 35.400 | -265                            |    |
| Av.             |                       |        |        |                       |   | -5.580 | 20                              |                       |       |        |                       |    | -3.083 | 23                              |                       |         |        |                       |   | 7.440  | -102                            |                       |       |         |                       |    | 36.985 | -258                            |    |
| SD              |                       |        |        |                       |   | 0.002  | 6                               |                       |       |        |                       |    | 0.509  | 4                               |                       |         |        |                       |   | 3.869  | 37                              |                       |       |         |                       |    | 1.351  | 15                              |    |
| P2-85-29-04-16  | -5.594                | 0.014  | -2.937 | 0.001                 | 3 | -5.610 | 21                              | -1.667                | 0.016 | -0.920 | 0.010                 | 3  | -1.668 | 7                               | 2.219                 | 0.067   | 1.127  | 0.050                 | 2 | 2.217  | -44                             | 30.718                | 0.385 | 15.920  | 0.212                 | 3  | 30.255 | -180                            | 7  |
| P1-85-10-05-16  | -5.542                | 22.510 | -2.898 | 22.807                | 3 | -5.558 | 33                              | -2.901                | 0.010 | -1.528 | 0.008                 | 3  | -2.905 | 5                               | 2.402                 |         | 1.238  |                       | 1 | 2.399  | -30                             | 31.151                | 0.206 | 16.149  | 0.122                 | 3  | 30.675 | -176                            | 1  |
| P2-85-20-05-16  | -5.561                | 0.014  | -2.897 | 0.018                 | 3 | -5.577 | 43                              | -3.975                | 0.018 | -2.082 | 0.010                 | 3  | -3.983 | 19                              | 1.103                 |         | 0.528  |                       | 1 | 1.102  | -54                             | 30.218                | 0.070 | 15.642  | 0.036                 | 2  | 29.770 | -198                            | 15 |
| P2-85-03-06-16  | n.v.                  |        | n.v.   |                       |   | n.v.   | n.v.                            | n.v.                  |       |        |                       | 3  |        |                                 | 0.802                 |         | 0.391  |                       | 1 | 0.802  | -32                             | 30.134                | 0.252 | 15.552  | 0.090                 | 2  | 29.689 | -244                            |    |
| Av.             |                       |        |        |                       |   | -5.581 | 32                              |                       |       |        |                       |    | -2.852 | 9                               |                       |         |        |                       |   | 1.630  | -40                             |                       |       |         |                       |    | 30.098 | -199                            |    |
| SD              |                       |        |        |                       |   | 0.026  | 11                              |                       |       |        |                       |    | 1.158  | 8                               |                       |         |        |                       |   | 0.796  | 11                              |                       |       |         |                       |    | 0.459  | 31                              |    |
| P3-100-10-05-16 | -5.582                | 0.034  | -2.930 | 0.028                 | 3 | -5.597 | 21                              | -2.607                | 0.010 | -1.365 | 0.009                 | 3  | -2.611 | 13                              | 9.125                 | 1.955   | 4.707  | 0.986                 | 2 | 9.084  | -100                            | 30.876                | 0.027 | 15.992  | 0.003                 | 2  | 30.409 | -190                            | 17 |
| P3-100-20-05-16 | -5.572                | 10.963 | -2.916 | 6.038                 | 3 | -5.588 | 29                              | -2.677                | 0.015 | -1.409 | 0.007                 | 3  | -2.680 | 6                               | 2.121                 |         | 1.094  |                       | 1 | 2.119  | -25                             | 29.901                | 0.148 | 15.497  | 0.071                 | 3  | 29.463 | -178                            | 6  |
| P3-100-03-06-16 | n.v.                  |        | n.v.   |                       |   | n.v.   | n.v.                            | n.v.                  |       | n.v.   |                       |    | n.v.   | n.v.                            | -5.382                |         | -2.844 |                       | 1 | -5.396 | 1                               | 30.286                |       | 15.676  |                       | 1  | 29.837 | -199                            |    |
| Av.             |                       |        |        |                       |   | -5.593 | 25                              |                       |       |        |                       |    | -2.646 | 9                               |                       |         |        |                       |   | 1.935  | -41                             |                       |       |         |                       |    | 29.903 | -189                            |    |
| SD              |                       |        |        |                       |   | 0.007  | 5                               |                       |       |        |                       |    | 0.049  | 5                               |                       |         |        |                       |   | 7.242  | 53                              |                       |       |         |                       |    | 0.477  | 11                              |    |
| Av.(a)          |                       |        |        |                       |   | -5.586 | 26                              |                       |       |        |                       |    | -2.889 | 16                              |                       |         |        |                       |   |        |                                 |                       |       |         |                       |    |        |                                 |    |
| SD (a)          |                       |        |        |                       |   | 0.006  | 5                               |                       |       |        |                       |    | 0.188  | 8                               |                       |         |        |                       |   |        |                                 |                       |       |         |                       |    |        |                                 |    |

(a) Calculated on the raw values.

1065

**Table S3.** Growth chamber experiment: predicted isotopic enrichment in  $^{18}\text{O}$  from irrigation water to leaf water ( $\Delta^{18}_{\text{LW-IW}}$ ) after Cernusak et al. (2016 ; Additional Supporting information). Refer to Cernusak et al. (1996) for symbol and calculations used in the table. Added calculations are displayed in grey columns:  $\Delta^{17}_{\text{LW-IW}}$  and  $^{17}\text{O-excess}_e$  were calculated using  $^{17}\alpha_{\text{eq}} = ^{18}\alpha_{\text{eq}}^{0.529}$  and  $^{17}\alpha_k = ^{18}\alpha_{\text{eq}}^{0.518}$ , for the equilibrium fractionation and kinetic fractionation, respectively.  $\theta_{\text{LW-IW}}$  was calculated as defined in the text. IW: irrigation water; LW : leaf water (LW).

| Sample          | Sampling details |            |                                    | Physiological data                 |                      | Isotopic data                    |                                  |                          |                          |                          |                          | Calculations                 |                               |           |                                 |                                 |                                              |                                              |                                      |                                      |                              |                              |                              |                              |                              |                              |                              |                              |                              |                              |                              |  |
|-----------------|------------------|------------|------------------------------------|------------------------------------|----------------------|----------------------------------|----------------------------------|--------------------------|--------------------------|--------------------------|--------------------------|------------------------------|-------------------------------|-----------|---------------------------------|---------------------------------|----------------------------------------------|----------------------------------------------|--------------------------------------|--------------------------------------|------------------------------|------------------------------|------------------------------|------------------------------|------------------------------|------------------------------|------------------------------|------------------------------|------------------------------|------------------------------|------------------------------|--|
|                 | Air tem.         | Leaf temp. | Air RH                             | Stomatal cond.                     | Boundary layer cond. | Atm. vapor $\delta^{18}\text{O}$ | Atm. vapor $\delta^{17}\text{O}$ | IW $\delta^{18}\text{O}$ | IW $\delta^{17}\text{O}$ | LW $\delta^{18}\text{O}$ | LW $\delta^{17}\text{O}$ | air vapor pressure-<br>$e_a$ | leaf vapor pressure-<br>$e_i$ | $w_s/w_i$ | $e_a$ for $\delta^{18}\text{O}$ | $e_i$ for $\delta^{17}\text{O}$ | $e^*$ for $\delta^{18}\text{O}$ at leaf temp | $e^*$ for $\delta^{17}\text{O}$ at leaf temp | $\Delta_a$ for $\delta^{18}\text{O}$ | $\Delta_i$ for $\delta^{17}\text{O}$ | Predicted                    |                              |                              |                              |                              |                              | Observed                     |                              |                              |                              |                              |  |
|                 |                  |            |                                    |                                    |                      |                                  |                                  |                          |                          |                          |                          |                              |                               |           |                                 |                                 |                                              |                                              |                                      |                                      | $^{17}\text{O}$ -excess $_e$ |                              |                              |                              |                              |                              | $^{17}\text{O}$ -excess $_e$ |                              |                              |                              |                              |  |
|                 |                  |            |                                    |                                    |                      |                                  |                                  |                          |                          |                          |                          |                              |                               |           |                                 |                                 |                                              |                                              |                                      |                                      | per meg                      |                              |                              |                              |                              |                              | per meg                      |                              |                              |                              |                              |  |
|                 |                  |            |                                    |                                    |                      |                                  |                                  |                          |                          |                          |                          |                              |                               |           |                                 |                                 |                                              |                                              |                                      |                                      | per meg                      |                              |                              |                              |                              |                              | per meg                      |                              |                              |                              |                              |  |
| °C              | °C               | %          | $\text{mol m}^{-2} \text{ s}^{-1}$ | $\text{mol m}^{-2} \text{ s}^{-1}$ | ‰                    | ‰                                | ‰                                | ‰                        | ‰                        | ‰                        | ‰                        | kPa                          | kPa                           |           | ‰                               | ‰                               | ‰                                            | ‰                                            | ‰                                    | ‰                                    | ‰                            | $\Delta^{18}_{\text{LW-IW}}$ | $\Delta^{17}_{\text{LW-IW}}$ | $\Delta^{18}_{\text{LW-IW}}$ | $\Delta^{17}_{\text{LW-IW}}$ | $\Delta^{18}_{\text{LW-IW}}$ | $\Delta^{17}_{\text{LW-IW}}$ | $\Delta^{18}_{\text{LW-IW}}$ | $\Delta^{17}_{\text{LW-IW}}$ | $\Delta^{18}_{\text{LW-IW}}$ | $\Delta^{17}_{\text{LW-IW}}$ |  |
| P1-40-29-04-16  | 25.0             | 25.0       | 41.2                               | 0.031                              | 2                    | -5.55                            | -2.91                            | -5.55                    | -2.91                    | 10.73                    | 5.52                     | 1.31                         | 3.18                          | 0.41      | 27.860                          | 14.336                          | 9.386                                        | 4.954                                        | 0.000                                | 0.000                                | 25.922                       | 13.426                       | 25.591                       | 13.336                       | -176                         | 0.521                        | 16.370                       | 16.238                       | 8.420                        | -154                         | 0.519                        |  |
| P10-40-10-05-16 | 25.0             | 25.0       | 41.3                               | 0.032                              | 2                    | -5.59                            | -2.93                            | -5.59                    | -2.93                    | 7.59                     | 3.87                     | 1.31                         | 3.18                          | 0.41      | 27.860                          | 14.336                          | 9.386                                        | 4.954                                        | 0.000                                | 0.000                                | 25.893                       | 13.411                       | 25.564                       | 13.322                       | -176                         | 0.521                        | 13.259                       | 13.171                       | 6.799                        | -155                         | 0.516                        |  |
| P1-40-20-05-16  | 25.0             | 25.0       | 41.9                               | 0.032                              | 2                    | -5.58                            | -2.92                            | -5.58                    | -2.92                    | 10.81                    | 5.55                     | 1.33                         | 3.18                          | 0.42      | 27.857                          | 14.334                          | 9.386                                        | 4.954                                        | 0.000                                | 0.000                                | 25.723                       | 13.324                       | 25.398                       | 13.236                       | -174                         | 0.521                        | 16.479                       | 16.345                       | 8.460                        | -170                         | 0.518                        |  |
| P1-40-03-06-16  | 25.0             | 25.0       | 41.4                               | 0.032                              | 2                    | n.v.                             | n.v.                             | n.v.                     | n.v.                     | 8.53                     | 4.36                     | 1.32                         | 3.18                          | 0.41      | 27.860                          | 14.336                          | 9.386                                        | 4.954                                        | n.v.                                 | n.v.                                 |                              |                              |                              |                              |                              |                              |                              |                              |                              |                              |                              |  |
| P10-60-29-04-16 | 25.0             | 25.0       | 60.5                               | 0.052                              | 2                    | -5.56                            | -2.93                            | -5.56                    | -2.93                    | 9.58                     | 4.94                     | 1.92                         | 3.18                          | 0.61      | 27.770                          | 14.290                          | 9.386                                        | 4.954                                        | 0.000                                | 0.000                                | 20.458                       | 10.627                       | 20.252                       | 10.571                       | -122                         | 0.522                        | 15.230                       | 15.115                       | 7.864                        | -117                         | 0.520                        |  |
| P2-60-10-05-16  | 25.0             | 25.0       | 60.2                               | 0.052                              | 2                    | -5.56                            | -2.92                            | -5.56                    | -2.92                    | 11.37                    | 5.83                     | 1.91                         | 3.18                          | 0.60      | 27.772                          | 14.291                          | 9.386                                        | 4.954                                        | 0.000                                | 0.000                                | 20.543                       | 10.670                       | 20.335                       | 10.614                       | -123                         | 0.522                        | 17.028                       | 16.885                       | 8.737                        | -178                         | 0.517                        |  |
| P10-60-20-05-16 | 25.0             | 25.0       | 60.5                               | 0.052                              | 2                    | -5.57                            | -2.92                            | -5.57                    | -2.92                    | 6.45                     | 3.32                     | 1.92                         | 3.18                          | 0.61      | 27.770                          | 14.290                          | 9.386                                        | 4.954                                        | 0.000                                | 0.000                                | 20.458                       | 10.627                       | 20.252                       | 10.571                       | -122                         | 0.522                        | 12.087                       | 12.014                       | 6.242                        | -101                         | 0.520                        |  |
| P10-60-03-06-16 | 25.0             | 25.0       | 60.3                               | 0.052                              | 2                    | n.v.                             | n.v.                             | n.v.                     | n.v.                     | 2.49                     | 1.24                     | 1.92                         | 3.18                          | 0.60      | 27.771                          | 14.291                          | 9.386                                        | 4.954                                        | n.v.                                 | n.v.                                 |                              |                              |                              |                              |                              |                              |                              |                              |                              |                              |                              |  |
| P2-85-29-04-16  | 25.0             | 25.0       | 80.2                               | 0.074                              | 2                    | -5.59                            | -2.94                            | -5.59                    | -2.94                    | 2.22                     | 1.13                     | 2.55                         | 3.18                          | 0.80      | 27.680                          | 14.244                          | 9.386                                        | 4.954                                        | 0.000                                | 0.000                                | 14.918                       | 7.789                        | 14.808                       | 7.758                        | -60                          | 0.524                        | 7.857                        | 7.826                        | 4.067                        | -65                          | 0.520                        |  |
| P1-85-10-05-16  | 25.0             | 25.0       | 76.6                               | 0.070                              | 2                    | -5.54                            | -2.90                            | -5.54                    | -2.90                    | 2.40                     | 1.24                     | 2.44                         | 3.18                          | 0.77      | 27.697                          | 14.252                          | 9.386                                        | 4.954                                        | 0.000                                | 0.000                                | 15.928                       | 8.306                        | 15.802                       | 8.272                        | -72                          | 0.523                        | 7.989                        | 7.957                        | 4.139                        | -62                          | 0.520                        |  |
| P2-85-20-05-16  | 25.0             | 25.0       | 81.5                               | 0.075                              | 2                    | -5.56                            | -2.90                            | -5.56                    | -2.90                    | 1.10                     | 0.53                     | 2.59                         | 3.18                          | 0.82      | 27.675                          | 14.241                          | 9.386                                        | 4.954                                        | 0.000                                | 0.000                                | 14.554                       | 7.602                        | 14.449                       | 7.573                        | -56                          | 0.524                        | 6.702                        | 6.679                        | 3.429                        | -97                          | 0.513                        |  |
| P2-85-03-06-16  | 25.0             | 25.0       | 82.5                               | 0.076                              | 2                    | n.v.                             | n.v.                             | n.v.                     | n.v.                     | 0.80                     | 0.39                     | 2.62                         | 3.18                          | 0.83      | 27.670                          | 14.239                          | 9.386                                        | 4.954                                        | n.v.                                 | n.v.                                 |                              |                              |                              |                              |                              |                              |                              |                              |                              |                              |                              |  |
| P3-100-10-05-16 | 25.0             | 25.0       | 100.0                              | 0.095                              | 2                    | -5.58                            | -2.93                            | -5.58                    | -2.93                    | 9.13                     | 4.71                     | 3.18                         | 3.18                          | 1.00      | 27.592                          | 14.199                          | 9.386                                        | 4.954                                        | 0.000                                | 0.000                                | 9.386                        | 4.954                        | 9.342                        | 4.942                        | 9                            | 0.529                        | 14.789                       | 14.681                       | 7.630                        | -122                         | 0.520                        |  |
| P3-100-20-05-16 | 25.0             | 25.0       | 100.0                              | 0.095                              | 2                    | -5.57                            | -2.92                            | -5.57                    | -2.92                    | 2.12                     | 1.09                     | 3.18                         | 3.18                          | 1.00      | 27.592                          | 14.199                          | 9.386                                        | 4.954                                        | 0.000                                | 0.000                                | 9.386                        | 4.954                        | 9.342                        | 4.942                        | 9                            | 0.529                        | 7.736                        | 7.706                        | 4.014                        | -54                          | 0.521                        |  |
| P3-100-03-06-16 | 25.0             | 25.0       | 100.0                              | 0.095                              | 2                    | n.v.                             | n.v.                             | n.v.                     | n.v.                     | -5.38                    | -2.84                    | 3.18                         | 3.18                          | 1.00      | 27.592                          | 14.199                          | 9.386                                        | 4.954                                        | n.v.                                 | n.v.                                 |                              |                              |                              |                              |                              |                              |                              |                              |                              |                              |                              |  |

Stomatal conductance: gs ranges from 0.1 to 0.5 in investigated C3 grasses is lower than 0.2 in C4 grasses. Cf Ocheltree et al., 2012. Here gs is calculated according to Li et al., 2017.  
Boundary layer cond: 0.2 to 3 in Li et al., 2017
